# Supplementary material for: Effect of rainfall-induced diabatic heating over southern China on the formation of wintertime haze on the North China Plain
Source: Copernicus journal article supplement (doi:10.5194/acp-2021-402), 2021-06-22
Supplement: Supplementary file [file acp-2021-402-AC1-supplement.pdf]

Dear reviewer #1,

We appreciate you for carefully reviewing our manuscript and providing the valuable suggestions to improve our paper. We have carefully read all comments and revised the manuscript as suggested. The following are our responses to all comments point by point. The italicized sentences are all comments, and the other sentences are the author's responses. The green sentences and words are the specific revisions. We also marked all relevant changes in the manuscript in the same way.

### Anonymous Referee #1

10 *Review of Effect of rainfall-induced diabatic heating over southern China on the formation of wintertime haze on the North China Plain (acp-2021-402):*

*An and the co-authors found when extreme rain fell over southern China, the probability of a haze event over the NCP during our research period of 1985–2015 was 59.09%. Further analysis revealed that the secondary circulation, associated with rainfall over southern China, in conjunction with Rossby wave trains along the waveguides may apt to the haze pollution over the NCP. This is important for understanding of haze pollutions over China. Although this manuscript fit into the scope of ACP, there are still several concerns must be addressed before publication.*

20 *Major comments:*

1. *The major concern is the small samples and half (13) and half (9) category. I suggest the authors to carefully illustrate the necessity of research and the robust of your revealed relationship. 50.9% is not a high probability.*

25 **Response:** Thanks for your suggestion. We are very sorry that we made mistakes when we counted the numbers of rainfall events. There are 19 rainfall events from 1985 to 2015, among which 13 cases accompanied by heavy haze in the NCP, namely, the proportion of which was about 68.42%

of the total. The new proportion does not change our conclusions. We have revised this proportion in the manuscript.

30 In this study, it should be noted that we selected haze cases in the NCP based on heavy rainfall cases in southern China selected by Ding and Li (2017), which means that atmospheric backgrounds of haze in the NCP might be same as that of rainfall in southern China. It is helpful to investigate the possible mechanism of the role of rainfall on haze under the similar background. The above method of selecting cases limits partly the numbers of haze cases.

35 In addition, to further check a robust relationship between haze in the NCP and rainfall in southern China, we calculated the EOF of  $PM_{2.5}$  concentration and precipitation (Fig. 1Sa). The second EOF mode of  $PM_{2.5}$  concentration, with a variance of 15.5% of total, shows a dipole pattern of  $PM_{2.5}$  concentration in eastern China. The first EOF mode of precipitation represents pattern of rainfall in southern China with a variance of 56.6% of total (Fig. 1Sb). The second EOF of  $PM_{2.5}$  and the first  
40 EOF of precipitation together represent the pattern of South rainfall–North pollution. The correlation coefficient between the PC index of these two EOF mode is  $-0.64$  (with a t-test level of 0.01), meaning that rainfall in southern China and air pollution in the NCP tend to occur simultaneously. The correlation coefficient between the interannual component of  $PM_{2.5}$  and Precipitation is  $-0.70$  (with t-test level of 0.01).

45 To further illustrate the necessity of research, we have limited the background of atmospheric circulation for the 68.42% probability in the manuscript.

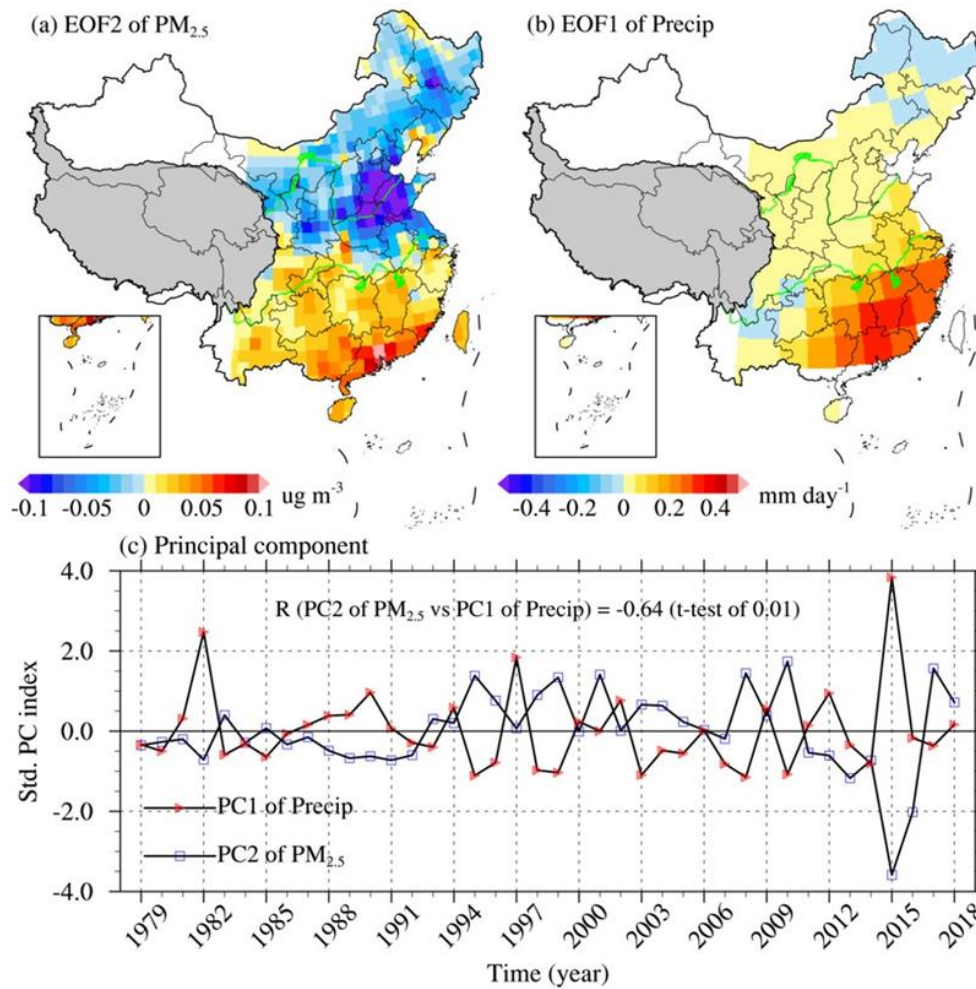

**Figure 1S:** The spatial distribution of EOF mode for 1979–2018 NDJ (a) PM<sub>2.5</sub> concentration (EOF2) and (b) precipitation (EOF1) within domain 10°N–60°N, 100°E–140°E. (c) The standardized principal component of EOF2 of PM<sub>2.5</sub> concentration (PC2) and EOF1 of precipitation (PC1). The variance explained by EOF2 of PM<sub>2.5</sub> concentration and EOF1 of precipitation are 15.5% and 56.6%, respectively. The North-test of these two EOF modes are true. The gray region denotes the Tibetan Plateau (An et al., 2021).

50

**Line 66–67:** “... that are based on greater number of haze events with the similar background of atmospheric circulation as rainfall in southern China ...”

55

**Line 69:** “... southern China under the similar background of atmospheric circulation.”

**Line 134:** “From 19 rainfall events ...”

**Line 139:** "... our research period of 1985–2015 was 68.42% under the similar background of atmospheric circulation."

60 **Line 503:** "... but for the 6 SR–noNH events in Table 2."

**Line 505:** "... for the 6 SR–noNH events ..."

**Table 2:**

Table 2. Start and end dates, and duration, of each SR–noNH event.

| No. | Start and end dates | Duration (days) | No. | Start and end dates | Duration (days) |
|-----|---------------------|-----------------|-----|---------------------|-----------------|
| 1   | 15–19 Feb 1985      | 5               | 4   | 24–28 Feb 2001      | 3               |
| 2   | 16–18 Feb 1998      | 6               | 5   | 25 Jan – 2 Feb 2008 | 10              |
| 3   | 24–26 Jan 2001      | 3               | 6   | 21–23 Jan 2010      | 6               |

65 2. *Possibly, to discuss the differences between SR-NH and SR–noNH is a helpful way. That is, to answer why there is no haze pollution in North China from the perspective of physical mechanisms.*

**Response:** Thank you very much. In this study, we have discussed the differences of atmospheric circulation between SR–NH and SR–noNH in section of discussion and conclusions. In the mid and upper troposphere, the differences between these two weathers seem to be weak except that the 500-hPa northeast Asian anomalous anticyclone is more westerly and the subtropical westerly jet wave train seems to be stronger in SR–NH events (Fig. 4 and Fig. 14). In addition, the atmospheric boundary layer height in SR–NH events is significantly lower than that in SR–noNH events (Fig. 8S of response for reviewer#2), which means that the descending motion related to the local north–south vertical circulation might be conducive to the formation of haze in the NCP. The above results indicate that rainfall in southern China is one of the potential factors affecting haze in the NCP (68.42% in this study), but not all rainfall events in southern China will affect haze in the NCP. For why there is no haze in the NCP in some rainfall events, it might be related to other factors, such as the East Asian winter wind (Liu et al., 2017; Zhao et al., 2018) or stratospheric process

80 (Huang et al., 2021). Our current study really can't answer this question, and it's a good topic for further study in the future. We have stressed this deficiency in the section of discussion to further discuss for more scientists in the future.

**Line 271–272:** “A comprehensive understanding of why there is no haze in the NCP despite some rainfall in southern China (6 SR–noNH events) needs to be added in the future.”

85

3. *It is difficult to say the anomalous large-scale atmospheric circulations over North China were simulated by the extreme rainfall. Possibly, it is a dipole pattern of atmospheric anomalies, which simultaneously influenced the haze in North China and rainfall in South China. The diabatic heating might be an attendant phenomenon. Thus, more robust evidences are required to make your arguments stand.*

90

**Response:** Yes, your consideration is right. The anomalous large-scale atmospheric circulations over North China were mainly related to the teleconnection wave trains such the EU pattern or the subtropical westerly wave train (Li et al., 2019; An et al., 2020; Zou et al., 2020). In addition, the dipole pattern of atmospheric anomalies in eastern China indeed can simultaneously influence haze in North China and rainfall in South China. In current research, however, we highlight the role of the local north–south vertical circulation related to rainfall in southern China on haze in the NCP. The strengthening of this local north–south vertical circulation might be related to ascending motion in southern China (Fig. 6 of the manuscript). While the ascending motion in southern China is related to the diabatic heating of rainfall (Figs. 11, 12 and 13). In addition, more shallow atmospheric boundary layer height in the NCP due to an anomalous descending motion also supports the role of the local north–south vertical circulation on haze in the NCP (Fig. 8S). We have revised some of the expressions in the manuscript to make it easier for readers to understand our intentions according to your suggestion.

95

100

**Line 16:** “... which are related to ...”

105

**Line 18:** “... anomalous anticyclonic circulation caused by the two Rossby wave trains, ...”

4. Related to the above comment, I suggest the authors re-plot the schematic diagram or provided more evidence to enhance the story line.

**Response:** Thanks for your suggestion. We have replotted the schematic diagram in the manuscript.

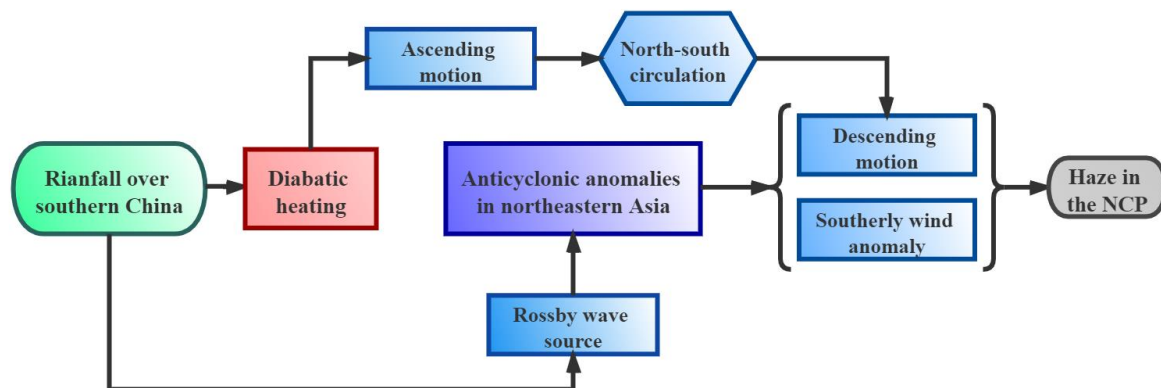

110

**Figure 13:** Schematic representation of the impact of heavy rainfall over southern China on haze production over the NCP.

5. Figure 9, 11 and related texts: I did not find anticyclonic responses over North China.

115

**Response:** We are sorry for this confusion. In this study, we highlight that diabatic heating related to rainfall in southern China supports the local north–south vertical circulation by strengthening anomalous upward motion in southern China (Figs 10, 11 and 12). From current results, there is no anticyclonic responses over North China from the LBM model. However, in Fig. 5, we find there is a strong Rossby wave source in southern China, supporting the propagation of the Rossby wave along the subtropical westerly jet, which might be a result of the positive feedback between the upward motion and anomalous precipitation in southern China. An et al. (2020) also found that almost all of the Rossby wave energy dispersing from the upstream along subtropical westerly jet waveguide was converged within southern China (Fig. 2S). It is worth noting that there is the Rossby wave energy in the north of South China dispersing to North China, which might be the result of the positive feedback between an anomalous upward motion and precipitation in southern China (Fig. 2S). In the LBM model, there is no the similar positive feedback. In addition, unlike the Gill-Matsuno response of the tropical atmosphere (Matsuno, 1966; Gill, 1980), there does not seem

120

125

to be a classical theory to support that diabatic heating on subtropical land will excite an (a) anticyclone (cyclones) on its north side. Therefore, we don't find anticyclonic responses over North China in Figs 9 and 11.

130

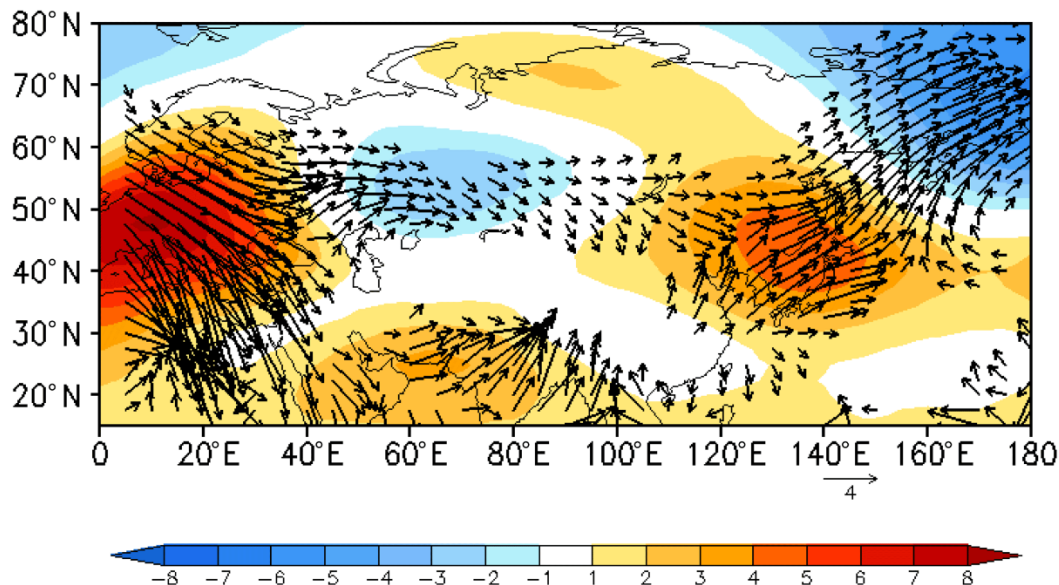

**Figure 2S:** Anomalous geopotential height (shading, 10 gpm) at 500 hPa in November and December 2015 and its stationary wave activity flux (vector,  $\text{m}^{-2} \text{s}^{-2}$ ) (An et al., 2020).

135

6. Why show visibility in Figure 2, but PM<sub>5</sub> concentrations in Figure 15? Can you kindly show me both of the anomalies visibility and PM<sub>2.5</sub> concentrations in the reply letter (relative to climatology), associated with SR–NH, SR–noNH and the left samples?

140

**Response:** Thank you very much. In this study, PM<sub>2.5</sub> concentration was considered as an assisting data to investigate the distribution of particulate matter. It does not change the main conclusions in this manuscript. According to your suggestion, we show PM<sub>2.5</sub> anomaly (relative to climatology of 1985–2015) associated with SR–NH and SR–noNH (Fig. 3S). Since we take the visibility of 10 km as the threshold for screening haze cases, its anomaly might not be a good indicator for our research, so we show the real value of visibility in Fig. 4S. From Fig. 3S, PM<sub>2.5</sub> concentration in the NCP is positive anomaly in SR–NH events, while PM<sub>2.5</sub> concentration in the NCP is negative anomaly in SR–noNH events. In SR–NH events, visibility in most areas of the NCP is significantly lower than

145



10km, while in SR–noNH events, almost no visibility in the NCP is lower than 10km. Therefore, visibility and PM<sub>2.5</sub> concentration can represent the atmospheric pollution in the NCP in this study.

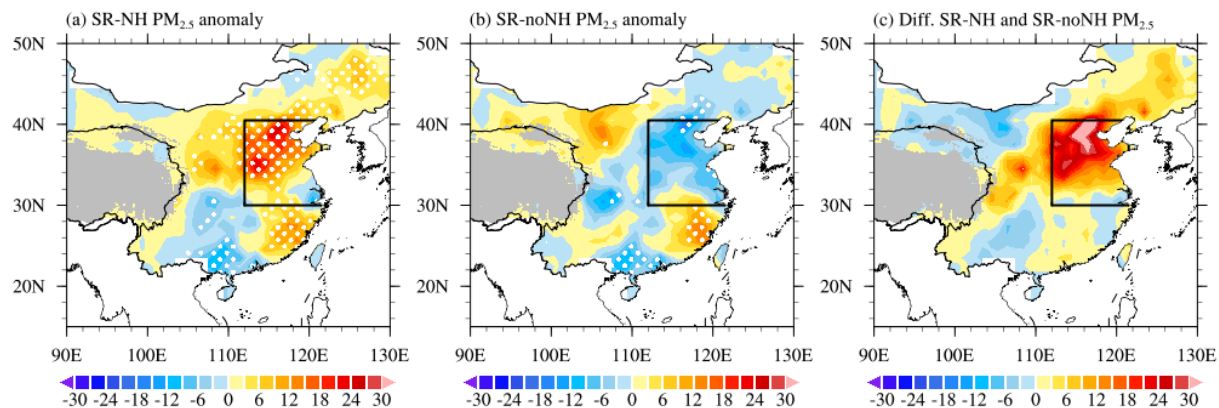

150 **Figure 3S:** Composite maps of PM<sub>2.5</sub> concentration anomaly for (a) SR–NH events, (b) SR–noNH events, and (d) difference between SR–NH events and SR–noNH events. White dotted regions indicate areas at the 95% confidence level based on the two-tailed Student’s t test.

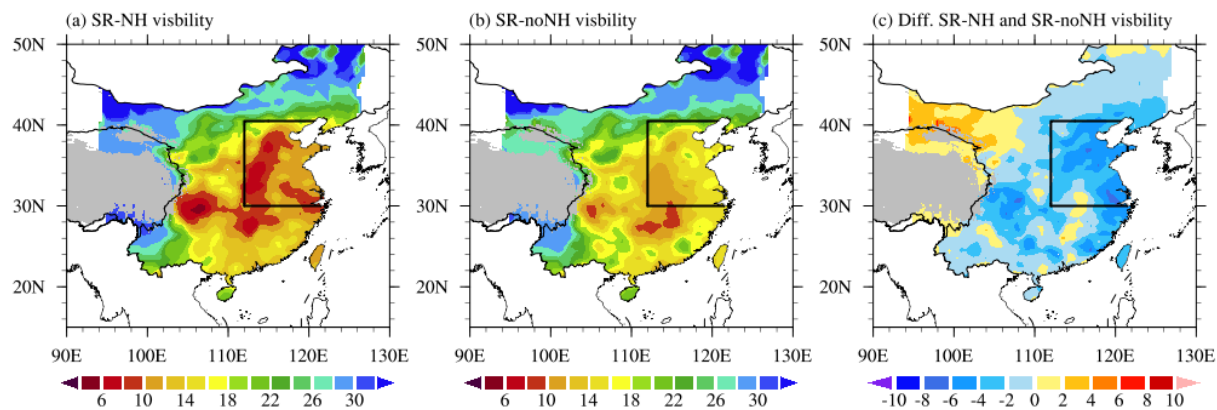

**Figure 4S:** Composite maps of visibility for (a) SR–NH events, (b) SR–noNH events, and (d) difference between SR–NH events and SR–noNH events.

155

*Specific comments:*



1. *Abstract: Some abbreviations, that occurred only once (or less than 3 times), are not necessary in abstract. Too much abbreviations are not easy to read. Possibly, the authors could also check the main texts throughout.*

160

**Response:** Thanks for your suggestion. Yes, we also realize that a large number of abbreviations might cause confusion to readers. Therefore, we have cancelled some abbreviations in the manuscript.

**Line 19:** "... with the north–south circulation system,"

165

**Line 23:** "... A linear baroclinic model,"

**Line 24:** "... observed north–south circulation system ..."

**Line 24–25:** "Quasi-geostrophic vertical pressure velocity diagnostics ..."

**Line 25:** "... the north–south circulation system made ..."

**Line 26–27:** "The results indicated that the north–south circulation system ..."

170

**Line 53:** "the SST anomalies ..."

**Line 53–55:** "the Pacific Decadal Oscillation (Zhao et al., 2016); the Arctic Oscillation (Cai et al., 2017; G. Zhang et al., 2019); the preceding Antarctic oscillation (i.e., August–September–October) (Z. Zhang et al., 2019); and the North Atlantic Oscillation (Feng et al., 2019; Li et al., 2021),"

**Line 63:** "... the local north–south circulation system (Fig. 1)."

175

**Line 79:** "... from Chinese Meteorological Administration (<http://www.nmic.cn/>) ..."

**Line 81:** "... from Chinese Meteorological Administration ..."

**Line 94:** "... by Chinese Meteorological Administration (2010),"

**Line 96–97:** "... by Chinese Meteorological Administration ..."

**Line 124:** "... The LBM (Watanabe and Kimoto, 2000),"

180

**Line 154–155:** "but they also weaken the East Asian winter monsoon (An et al., 2020),"

**Line 165:** "... the Eurasian teleconnection (EU),"

**Line 167:** "... the development of the East Asian winter monsoon (An et al., 2020),"

**Line 195:** "... forms the local north–south circulation system ..."

**Line 217:** "... the local north–south circulation system seems ..."

185

**Line 226:** "The local north–south circulation system simulated by ..."

**Line 227:** “of the local north–south circulation system (Figs 5 and 10),”

**Line 227:** “... the results obtained by An et al. (2020).”

**Line 251:** “which in turn maintains the local north–south circulation system...”

**Line 259:** “... (referred to as the local north–south circulation system in this paper).”

190 **Line 266:** “... a similar the local north–south circulation system (not shown),”

**Line 282–283:** “the Arctic Oscillation (Cai et al., 2017),”

**Line 286–287:** “... the China Meteorological Administration (<http://data.cma.cn/>, 2017),”

**Line 436:** “... of the local north–south circulation system.”

195 2. *Line 26: The ‘diabatic heating’ was defined as  $Q$  much later (Line 107).*

**Response:** Thank you very much. We have revised the sentence in the manuscript.

**Line 26:** “... and diabatic heating ( $Q$ ).”

3. *Line 30: The range of NCP should be added in the text, and the others are similar.*

200 **Response:** Thanks for your suggestion. We have added the range of the NCP in the manuscript.

**Line 13–14:** “... the North China Plain (NCP, 30–40.5°N, 112–121.5°E) suffered many periods of heavy haze, ...”

**Line 31:** “Extensive heavy haze on the North China Plain (NCP, 30–40.5°N, 112–121.5°E) has ...”

205 4. *Line 46–47: “Overall, the role of meteorology in the generation of haze is crucial but uncertain, and may be closely related to the regulation of the large-scale circulation”. This sentence must be rephrased, because the meanings are confused.*

**Response:** We are sorry for this confusion. We have rephrased this sentence in the manuscript.

210 **Line 47:** “Overall, the role of meteorology modulated by the large-scale circulation in the generation of haze is crucial but uncertain.”

5. *Line 51: The abbreviation of SSTAs may be not necessary.*

**Line 51:** “the SST anomalies related to ...”

215 6. Line 83: PM<sub>2.5</sub> here has a format error.

**Line 85:** “These daily PM<sub>2.5</sub> concentrations ...”

220 7. Line 83–85: Because the climate scientist must carefully choose the data series, can you show the readers about the quality assessment of Yang’s PM<sub>5</sub> datasets for the period 1980–2019? In my opinion, excellent agreement with ground measurements during 2013–2019 did not illustrate good performance for the period 1980–2019.

**Response:** Yes, you are right. We also realize that there might be some limitations in using this dataset to investigate atmospheric pollution process on the synoptic scale. According to Li et al. (2021), PM<sub>2.5</sub> dataset is only assessed based on observation data from 2014 to 2019 due to the lack of long-term PM<sub>2.5</sub> data. The dataset is obtained by machine learning based on supplementary data such as visibility observation data from 1980 to 2019. A continuous increase of the mean PM<sub>2.5</sub> from 1985 to 2014 shows a similar trend to PM<sub>2.5</sub> data simulated with GEOS-Chem model by Yang et al. (2016) (Li et al., 2021) (Fig. 2S and Fig. 3S). It might be a good choice to study the interannual variation of air pollution in the NCP based on this dataset. For the weather scale pollution process, however, it might have some limitations. Therefore, it was only considered as an assisting data for this study. It will not change main conclusions in the manuscript.

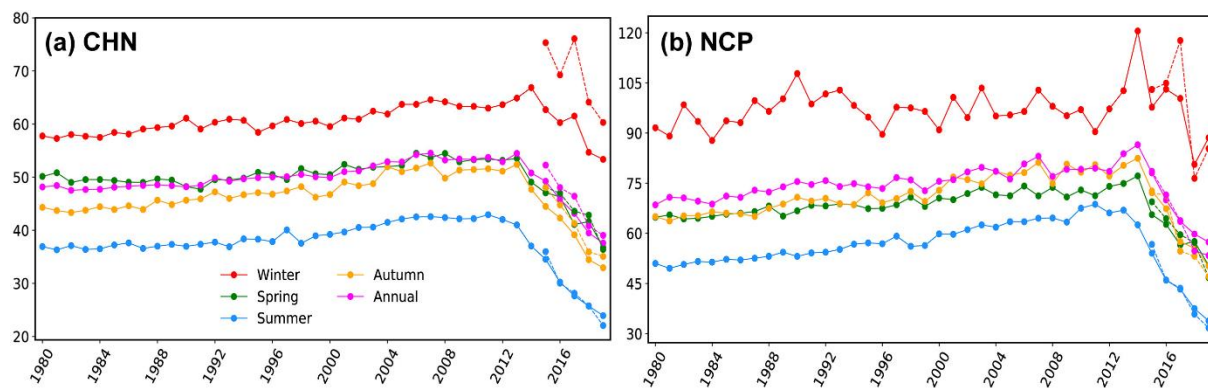

235 **Figure 5S:** Time series of annual mean (purple lines) and seasonal means of modeled PM<sub>2.5</sub> (colored solid lines) from 1980 to 2019 and corresponding observed PM<sub>2.5</sub> (colored dashed lines) from 2015 to 2019 averaged over China and the NCP (Li et al., 2021).

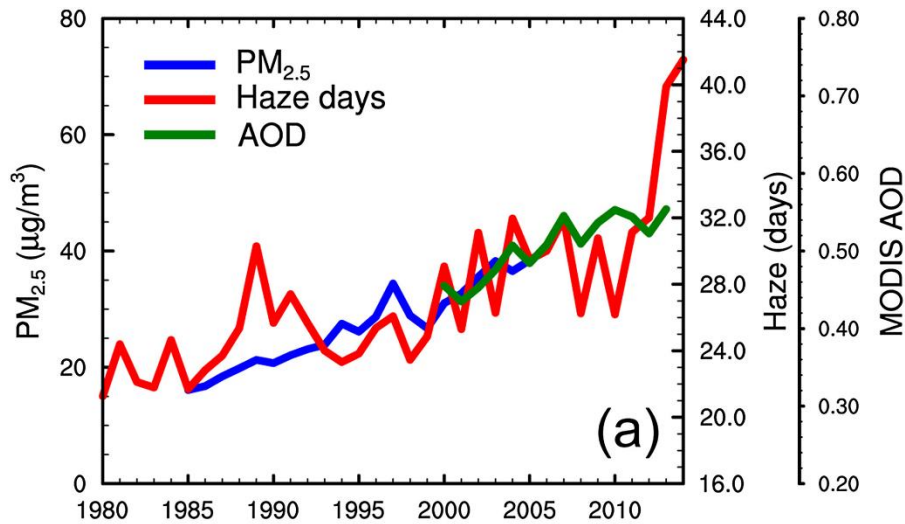

**Figure 6S:** The time series of (a) simulated surface-layer PM<sub>2.5</sub> concentrations from the CTRL simulation ( $\mu\text{g m}^{-3}$ ), observed haze days (days), and MODIS aerosol optical depth (AOD) averaged over 196 stations in eastern China in DJF for 1985–2005, 1980–2014, and 2000–2013, respectively (Yang et al., 2016).

240

8. *Line 162: Add the full name of 'EU' if it is the first time it appears.*

**Line 165:** "... the Eurasian teleconnection (EU),"

245

9. *Line 251: "the appearance of haze over the NCP" may only be some of haze event, which related to the rainfall over southern China.*

**Response:** Thanks for your suggestion. We have revised the sentence in the manuscript.

**Line 255:** "... the appearance of some of haze events over the NCP ..."

250

10. *Figure 1: the color of the circular arrow was confusing.*

**Response:** We are sorry for this confusion. We have replotted Figure 1 as your suggestion.

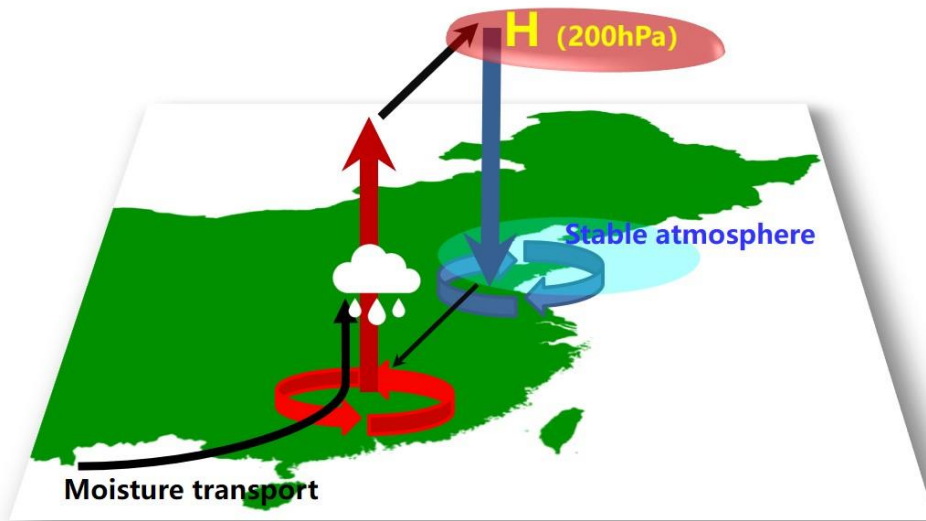

**Figure 1:** Schematic illustration of the local north–south circulation system. The red (blue) circular arrow indicates the anomalous cyclone (anticyclone), the red (blue) vertical arrow indicates ascending (descending) motion, the thick black arrow indicates northward movement in the upper-level troposphere, H indicates the anticyclonic anomaly, and the white cloud indicates rainfall (see An et al. (2020) for caption details).

11. Figure 6:  $\omega > 0$  ( $\text{Pa s}^{-1}$ , shading) means descending motion, why is it an ascending motion here?

Is it multiplied by  $-1$ ?

**Response:** We are sorry for this confusion. Yes,  $\omega$  was multiplied  $-1$  as you guessed. We have added more detail to the caption of Figure 6.

**Line 463–466:** Figure 6: Composite sections of absolute values for the 13 SR–NH events: latitude–height sections of (a) vertical velocity (shading, unit:  $-1 \text{ Pa s}^{-1}$ ) and wind vectors ( $v$  and  $-\omega$ ) averaged over  $112^\circ$ – $120^\circ$  E, and longitude–height cross sections of (b) vertical velocity (shading, unit:  $-1 \text{ Pa s}^{-1}$ ) and wind vectors ( $u$  and  $-\omega$ ) averaged over  $20^\circ$ – $30^\circ$  N and (c)  $30^\circ$ – $40^\circ$  N. White dotted regions indicate areas at the 99% confidence level based on the two-tailed Student’s t test.

12. Figure 7: The positive velocity potential may represent divergence.

270 **Response:** Yes, you are right. According to the definition of the velocity potential  $\varphi$  by Tanaka et al. (2004),

$$D = \nabla \cdot V = -\nabla^2 \varphi,$$

here, the positive velocity potential represents divergence. The divergent wind  $V\varphi$  flows from the maximum to the minimum of the velocity potential field (Tanaka et al., 2004).

275 It is noted that the *Helmholtz* theorem and the original definition by Lamb (1945) has no minus sign on the right-hand side, which implies that the negative velocity potential represents divergence. In this study, we calculated the velocity potential following the definition of  $D = \nabla^2 \varphi$ . The negative velocity potential represents divergence.

280 As Fig. 7S, Weng et al. (2007) also calculated velocity potential according to the definition of  $D = \nabla^2 \varphi$ . We have added the illustration for the velocity potential shown in Fig. 7.

**Line 471: “The divergent wind flows from the minimum to the maximum of the velocity potential field.”**



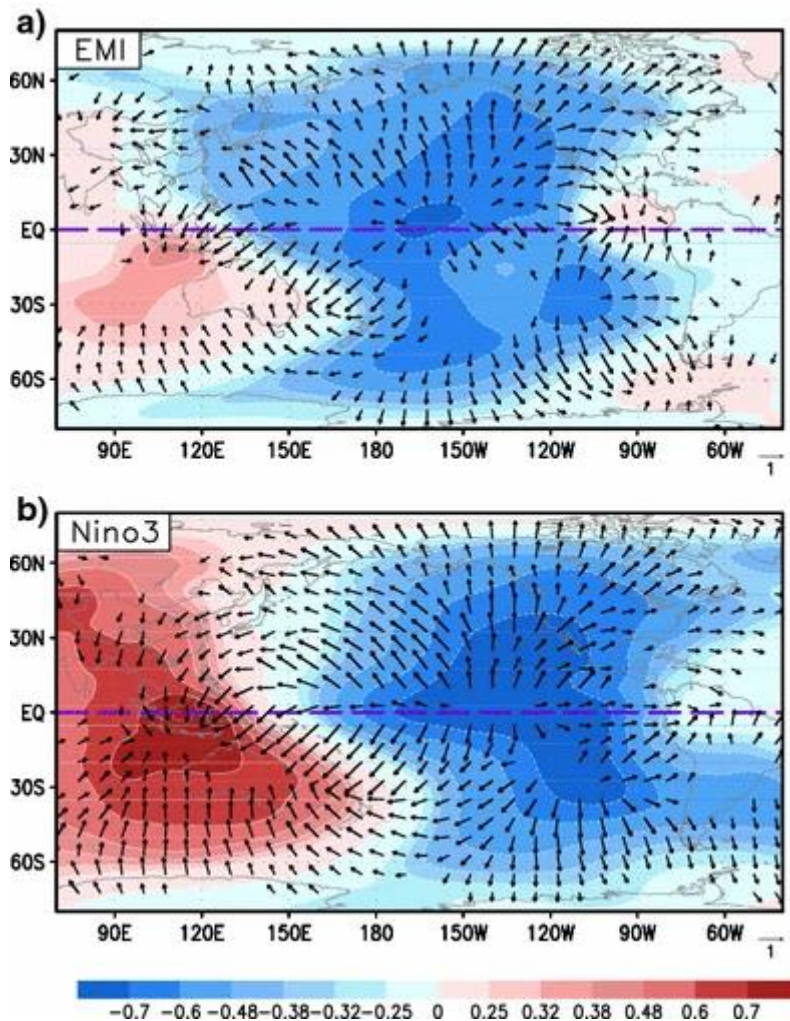

285 **Figure 7S:** Partial correlation patterns of the 200 hPa divergent winds (arrow) and velocity potential anomalies (shading) with a) EMI and b) Niño3 in the domain of (70°E–40°W, 80°S–80°N). The wind vectors with correlation coefficients of either zonal or meridional component that are not significant at the 90% level are omitted (Weng et al., 2007).

13. *Figure 10: “As Fig. 5,” may be “Fig. 6”?*

**Response:** Yes, it is Fig. 6. We have revised the caption of Figure 10.

290 **Line 484:** Figure 10: As Fig. 6, except for the results from the LBM. For clarity,  $\omega$  is multiplied by  $-20$ .



14. *How did you composite the maps associated with 13 SR–NH events. I did not find it in any of the Figure captions.*

295 **Response:** We are sorry that we didn't add an illustration for composite maps. In this study, we firstly calculated average all days of each case, then all case were averaged for composite the map. We have added the description of composite analysis in section 2.

**Line 131:** “All composite maps were obtained from the average of each individual case.”

## 300 **References**

- An, X. D., Wang, F., Sheng, L. F., and Li, C.: Pattern of wintertime South Rainfall–North Pollution over eastern China: the role of the El Niño–Southern Oscillation, *J. Climate*, [Under Review], 2021.
- An, X. D., Sheng, L. F., Liu, Q., Li, C., Gao, Y., and Li, J. P.: The combined effect of two westerly jet waveguides on heavy haze in the North China Plain in November and December 2015, *Atmos. Chem. Phys.*, 20, 4667–4680, <https://doi.org/10.5194/acp-20-4667-2020>, 2020.
- 305 Ding, F. and Li, C.: Subtropical westerly jet waveguide and winter persistent heavy rainfall in south China, *J. Geophys. Res. Atmos.*, 122, 7385–7400, <https://doi.org/10.1002/2017JD026530>, 2017.
- Gill, A. E.: Some Simple Solutions for Heat-Induced Tropical Circulation, *Q. J. R. Meteorolog. Soc.*, 106, 447–462, <https://doi.org/10.1002/qj.49710644905>, 1980.
- 310 Huang, W., Yu, Y., Yin, Z., Chen, H., and Gao, M.: Appreciable role of stratospheric polar vortex in the abnormal diffusion of air pollutant in North China in 2015/2016 winter and implications for prediction, *Atmos. Environ.*, 259, 118549, <https://doi.org/10.1016/j.atmosenv.2021.118549>, 2021.
- Li, H., Yang, Y., Wang, H., Li, B., Wang, P., Li, J., and Liao, H.: Constructing a spatiotemporally coherent long-term PM<sub>2.5</sub> concentration dataset over China during 1980–2019 using a machine learning approach, *Sci. Total Environ.*, 765, 144263, <https://doi.org/10.1016/j.scitotenv.2020.144263>, 2021.
- 315 Li, Y., Sheng, L. F., Li, C., and Wang, Y. H.: Impact of the Eurasian Teleconnection on the Interannual Variability of Haze-Fog in Northern China in January, *Atmosphere*, 10, 113, <https://doi.org/10.3390/atmos10030113>, 2019.

- 320 Liu, Q., Sheng, L., Cao, Z., Diao, Y., Wang, W., and Zhou, Y.: Dual effects of the winter monsoon on haze-fog variations in eastern China, *J. Geophys. Res. Atmos.*, 122, 5857–5869, <https://doi.org/10.1002/2016JD026296>, 2017.
- Matsuno, T.: Quasi-geostrophic motion in the equatorial area, *J. Meteor. Soc. Japan*, 44, 25–43, 325 [https://doi.org/10.2151/jmsj1965.44.1\\_25](https://doi.org/10.2151/jmsj1965.44.1_25), 1966.
- Tanaka, H. L., Ishizaki, N., and Kitoh, A.: Trend and interannual variability of Walker, monsoon and Hadley circulations defined by velocity potential in the upper troposphere, *Tellus* 56A:250–269, 2004.
- Weng, H. Y., Ashok, K., Behera, S. K. Rao, S. A., and Yamagata, T.: Impacts of recent El Niño Modoki 330 on dry/wet conditions in the Pacific rim during boreal summer, *Clim. Dyn.*, 29, 113–129, <https://doi.org/10.1007/s00382-007-0234-0>, 2007.
- Yang, Y., Liao, H., and Lou, S.: Increase in winter haze over eastern China in recent decades: Roles of variations in meteorological parameters and anthropogenic emissions, *J. Geophys. Res. Atmos.*, 121, 13050–13065, doi:10.1002/2016JD025136, 2016.
- 335 Zhao, S. Y., Feng, T., Tie, X., Long, X., Li, G., Cao, J., et al.: Impact of Climate Change on Siberian High and Wintertime Air Pollution in China in Past Two Decades, *Earth's Future*, 6, 118–133. <https://doi.org/10.1002/2017EF000682>, 2018.
- Zou, Y., Wang, Y., Xie, Z., Wang, H., and Rasch, P. J.: Atmospheric teleconnection processes linking 340 winter air stagnation and haze extremes in China with regional Arctic sea ice decline, *Atmos. Chem. Phys.*, 20(8), 4999–5017. <https://doi.org/10.5194/acp-20-4999-2020>, 2020.

# Effect of rainfall-induced diabatic heating over southern China on the formation of wintertime haze on the North China Plain

Xiadong An<sup>1</sup>, Lifang Sheng<sup>1,2,3</sup>, Chun Li<sup>1,3</sup>, Wen Chen<sup>4</sup>, Yulian Tang<sup>4</sup>, Jingliang Huangfu<sup>4</sup>

345 <sup>1</sup>Department of Marine Meteorology, College of Oceanic and Atmospheric Sciences, Ocean University of China, Qingdao 266100, China

<sup>2</sup>Key Laboratory of South China Sea Meteorological Disaster Prevention and Mitigation of Hainan Province, Haikou 570000, China

350 <sup>3</sup>Ocean-Atmosphere Interaction and Climate Laboratory, Key Laboratory of Physical Oceanography, Ocean University of China, Qingdao 266100, China

<sup>4</sup>Center for Monsoon System Research, Institute of Atmospheric Physics, Chinese Academy of Sciences, Beijing 100190, China

*Correspondence to:* Lifang Sheng (shenglf@ouc.edu.cn)

**Abstract.** During the winters (December–February) between 1985 and 2015, the North China Plain (NCP, 30–40.5°N, 112–121.5°E) suffered many periods of heavy haze, and these episodes were contemporaneous with extreme rainfall over southern China; i.e., South Rainfall–North Haze events. The formation of such haze events depends on meteorological conditions, which are related to the atmospheric circulation associated with rainfall over southern China, but the underlying physical mechanism remains unclear. This study uses observations and model simulations to demonstrate that haze over the NCP is modulated by anomalous anticyclonic circulation caused by the two Rossby wave trains, in conjunction with the north–south circulation system, which ascends over southern China, moves north into northern China near 200–250 hPa, and then descends in the study area. Moreover, in response to rainfall heating, southern China is an obvious Rossby wave source, supporting waves along the subtropical westerly jet waveguide and finally strengthening anticyclonic circulation over the NCP. Composite analysis indicates that these changes lead to a stronger descending motion, higher relative humidity, and a weaker northerly wind, which favors the production and accumulation of haze over the NCP. A linear baroclinic model simulation reproduced the observed north–south circulation system reasonably well and supports the diagnostic analysis. Quasi-geostrophic vertical pressure velocity diagnostics were used to quantify the contributions to the north–south circulation system made by large-scale adiabatic forcing and diabatic heating ( $Q$ ). The results indicated that the north–south circulation system is induced mainly by diabatic heating related to precipitation over southern China, and the effect of large-scale circulation is negligible. These results provide the basis for a more comprehensive understanding of the mechanisms that drive the formation of haze over the NCP.

365  
370

## 1 Introduction

Extensive heavy haze on [the North China Plain \(NCP, 30–40.5°N, 112–121.5°E\)](#) has a detrimental effect on both human health and social activities (Chen et al., 2017; Hughes et al., 2018; Lelieveld et al., 2019; Li et al., 2019). These haze events are caused by emissions of pollutants combined with unfavorable meteorological conditions (Yang et al., 2016; Cai et al., 2017; Ding et al., 2017; Zhang et al., 2021). Although emissions play an important role in the generation of haze, numerous studies have suggested that meteorology is also a significant factor in the occurrence of extreme haze events (Quan et al. 2011; Wang et al. 2015; Gao et al. 2016; Stirnberg et al., 2021). For instance, Dang and Liao (2019) found that large interannual variations in the frequency and intensity of severe winter haze days were driven mainly by changes in meteorology. Chen and Wang (2015) also showed that the occurrence of severe haze events over northern China during the winter generally correlates with meteorological factors. Y. Q. Zhang et al. (2020) provided evidence that the accumulation of pollutants caused by unfavorable meteorological conditions has offset the decreases caused by emissions reductions during the COVID-19 lockdown, leading to the high aerosol concentrations over Beijing–Tianjin–Hebei that developed between 7 and 14 February 2020. Unfortunately, continued global warming will further increase the incidence of haze days in China by reducing the wind strength (Cai et al., 2017; Xu et al., 2019). Callahan and Mankin (2020) found that climate change will lead to haze-favorable conditions over Beijing becoming more frequent, but that internal variability can generate large uncertainties in these projections. There is little doubt that developing an improved understanding of the factors and mechanisms that causes haze is one of the greatest challenges facing researchers over the coming decades.

[Overall, the role of meteorology modulated by the large-scale circulation in the generation of haze is crucial but uncertain.](#) Large-scale circulations regulate meteorological condition linking reducing dispersion by atmospheric teleconnection and facilitate the accumulation of haze pollutants (Y. Zhang et al., 2020). Hence, the predictability of wintertime heavy haze over the NCP stems from the underlying meteorological factors. These include, but not limited to: Eurasian snow cover and central Siberian soil moisture (Zhang et al., 2020); the [SST anomalies](#) related to El Niño–Southern Oscillation (ENSO) in the tropical Pacific (Feng et al., 2019; G. Zhang et al., 2019; Yu et al., 2020; Zhang et al., 2020) and the Atlantic Oceans (Wang et al., 2019; Zhang et al., 2020); the [Pacific Decadal Oscillation](#) (Zhao et al., 2016); the [Arctic Oscillation](#) (Cai et al., 2017; G. Zhang et al., 2019); the preceding Antarctic oscillation (i.e., August–September–October) (Z. Zhang et al., 2019); and the [North Atlantic Oscillation](#) (Feng et al., 2019; Li et al., 2021), as well as Arctic sea ice changes (Zou et al., 2020), especially in the Beaufort Sea (Yin et al., 2019a; Li and Yin, 2020) and Chukchi Sea (Yin et al., 2019b).

Recent studies have further documented that heavy haze over the NCP can be attributed to anticyclonic anomalies over northeastern Asia (AANA) caused by westerly-jet wave trains in the middle to upper troposphere over the Eurasian continent (Chen et al., 2019; Wang et al., 2019; An et al., 2020). As a synoptic-scale circulation, these AANA are accompanied by anomalous southeasterly winds near the surface, as well as a temperature inversion layer and anomalous vertical motion in the surrounding areas, which encourages the development of severe haze (Zhong et al., 2019; An et al., 2020). It is worth mentioning that An et al. (2020) also found that the atmospheric circulation related to rainfall over southern China further

supports the maintenance of heavy haze in the AANA background over the NCP via the **local north–south circulation system** (Fig. 1). However, their interpretation was based only on isolated extreme heavy haze events during November and December 2015 (An et al., 2020). To determine whether this finding was simply a special case, further investigations will be required that are based on greater number of haze events **with the same background of atmospheric circulation as rainfall in southern China** over a longer period. Consequently, in this study, we aim to investigate the mechanisms associated with haze formation over the NCP between 1985 and 2015, with an emphasis on the role of circulation related to rainfall-induced diabatic heating in southern China **under the same background of atmospheric circulation**. In addition, given the potential role of circulation related to rainfall over southern China in maintaining heavy haze over the NCP, we will also explore diabatic heating using a linear baroclinic model (LBM) run under heating forcing in southern China.

The remainder of the paper is organized as follows. The second section describes the datasets and methods used in this work. This is followed by a more extensive section describing the haze events and associated weather patterns. The fourth section introduces the role of diabatic heating caused by rainfall on haze formation over the NCP, which we simulated using the LBM. The paper concludes with a brief summary and discussion of the formation of haze over the NCP.

## 2 Data and methods

### 2.1 Data

We obtained quality-controlled in situ daily rainfall data from 194 stations in China covering the period January 1985 to February 2015 from **Chinese Meteorological Administration** (<http://www.nmic.cn/>) to determine the distribution of rainfall over southern China. Daily visibility data from meteorological stations in the region bounded by 15–55° N, 105–135° E from January 1985 to December 2015 were also obtained from **Chinese Meteorological Administration**. Such observed rainfall (Li and Sun, 2015; Ding and Li, 2017) and visibility (e.g., Liu et al., 2017; An et al., 2020) data have been widely used in previous research into extreme rainfall and haze events. In addition, the daily PM<sub>2.5</sub> concentration dataset for China for the period 1980–2019 was collated by Y. Yang (2020) using data available at <https://zenodo.org/record/4293239#.YJI3J8DiuUn>. These daily PM<sub>2.5</sub> concentrations were in excellent agreement with ground measurements, with a coefficient of determination of 0.95 and mean relative error of 12% (Li et al., 2021).

The atmospheric reanalysis data including geopotential, zonal and meridional wind, relative humidity, air temperature, and vertical velocity, were obtained from the National Centers for Environmental Prediction–National Center for Atmospheric Research (NCEP–NCAR) NCEP–DOE AMIP-II Reanalysis (R-2) dataset (Kanamitsu et al., 1996), provided by the NOAA/OAR/ESRL PSD, Boulder, Colorado, USA (<http://www.esrl.noaa.gov/psd/>). The data used in this study cover a 31-year period from 1985 to 2015, with a 1-day resolution, a horizontal spatial resolution of 2.5° longitude × 2.5° latitude, and vertical levels from 1000 to 100 hPa.

## 2.2 Methods

435 In accordance with the standards set by [Chinese Meteorological Administration](#) (2010), we defined haze as a day on which the daily mean visibility and relative humidity were less than 10 km and 80%, respectively, and when no rain, snow, or sand and dust storms occurred. This identification method has been applied to the forecast of haze-fog by [Chinese Meteorological Administration](#) and is particularly useful for studying haze (e.g., Liu et al., 2017; An et al., 2020).

To analyze the distribution of heating associated with rainfall, we calculated the atmospheric apparent heat source ( $Q_1$ ) according to the equation obtained by Yanai et al. (1973):

$$Q_1 = c_p \frac{\partial T}{\partial t} - c_p (\omega \sigma - \mathbf{V} \cdot \nabla T), \quad (1)$$

where  $c_p$  denotes the specific heat at constant pressure,  $T$  is the air temperature,  $t$  is the time,  $\omega$  is the vertical pressure velocity, the static stability  $\sigma = (RT/c_p p) - (\partial T/\partial p)$ ,  $R$  is the gas constant,  $p$  is the pressure,  $\mathbf{V}$  is the horizontal wind vector,  $\nabla$  is the horizontal gradient operator,  $L$  is the latent heat of condensation, and  $q$  is the specific humidity. Here,  $Q_1$  represents the total diabatic heating (including radiation, latent heating, and surface heat flux) and the subgrid-scale heat flux convergences (Yanai et al., 1973).

According to Nie et al. (2020), the quasigeostrophic (QG) vertical pressure velocity ( $\omega$ ) diagnostics is can be used to decompose  $\omega$  in extreme precipitation into one part ( $\omega_D$ ) due to large-scale adiabatic forcing ( $F$ ) and another part ( $\omega_Q$ ) due to diabatic heating ( $Q$ ). The QG  $\omega$  equation reads:

$$450 \quad \left( \partial_{pp} + \frac{\sigma}{f^2} \nabla^2 \right) \omega = -\frac{1}{f} \partial_p \text{Adv}_\zeta - \frac{R}{pf^2} \nabla^2 \text{Adv}_T - \frac{R}{pf^2} \nabla^2 Q, \quad (2)$$

where  $\sigma = -\frac{RT}{p} \partial_p \ln \theta$  is the dry static stability, and  $f$  is the Coriolis parameter. the terms  $\text{Adv}_\zeta = -\vec{\mathbf{V}}_g \cdot \nabla \zeta$  and  $\text{Adv}_T = -\vec{\mathbf{V}}_g \cdot \nabla T$  are the horizontal advection of geostrophic absolute vorticity ( $\zeta$ ) and temperature ( $T$ ), respectively, by the geostrophic winds.

To explore the propagation of anomalous Rossby waves along the subtropical westerly jet waveguide in the Northern Hemisphere, the horizontal stationary wave activity flux can be calculated, as follows (Takaya and Nakamura, 2001):

$$455 \quad \mathbf{W} = \frac{p \cos \phi}{2|\mathbf{U}|} \cdot \left( \begin{array}{l} \frac{\mathbf{U}}{a^2 \cos^2 \phi} \left[ \left( \frac{\partial \psi'}{\partial \lambda} \right)^2 - \psi' \frac{\partial^2 \psi'}{\partial \lambda^2} \right] + \frac{\mathbf{V}}{a^2 \cos \phi} \left[ \frac{\partial \psi'}{\partial \lambda} \frac{\partial \psi'}{\partial \phi} - \psi' \frac{\partial^2 \psi'}{\partial \lambda \partial \phi} \right] \\ \frac{\mathbf{U}}{a^2 \cos \phi} \left[ \frac{\partial \psi'}{\partial \lambda} \frac{\partial \psi'}{\partial \phi} - \psi' \frac{\partial^2 \psi'}{\partial \lambda \partial \phi} \right] + \frac{\mathbf{V}}{a^2} \left[ \left( \frac{\partial \psi'}{\partial \phi} \right)^2 - \psi' \frac{\partial^2 \psi'}{\partial \phi^2} \right] \end{array} \right), \quad (3)$$

where  $\mathbf{W}$  is the wave activity flux with unit of  $\text{m}^2 \text{s}^2$ ,  $\psi$  ( $= \Phi/f$ ) is the geostrophic stream function,  $\Phi$  (gpm) is the geopotential height, and  $f$  ( $= 2\Omega \sin \phi$ ) is the Coriolis parameter.  $\mathbf{U}$  ( $= (U, V)^T$ ;  $\text{m s}^{-2}$ ) is the basic flow. We used the daily reanalysis data; i.e., the daily zonal wind, meridional wind, and anomalous geopotential height (for the stream function) to calculate the vector  $\mathbf{W}$ .

460 We calculated the linearized Rossby wave source according to Sardeshmukh and Hoskins (1988), which can be expressed as follows:

$$S = -\nabla_H \cdot \{ \mathbf{u}'_\chi (f + \bar{\zeta}) \} - \nabla_H \cdot \{ \mathbf{u}'_\chi \zeta' \}. \quad (4)$$

Here,  $\mathbf{u} = (u, v)$  denotes the horizontal wind velocity,  $\nabla_H$  is the horizontal gradient, and the subscript  $\chi(\psi)$  represents the divergent (rotational) component. Overbars indicate the climatological mean and primes signify anomalies.

465 **The LBM** (Watanabe and Kimoto, 2000), a simple dry model, has been widely used to examine the steady linear response to idealized diabatic heating (Lu and Lin 2009; Sample and Xie, 2010; Xu et al., 2020; Hu et al., 2020). This model consists of basic equations linearized with respect to the mean state of the December (0)–February (1) (DJF) climatology from the NCEP–DOE reanalysis for 1981–2010. The version used here has a horizontal resolution of T42 (roughly equivalent to  $2.8^\circ$ ) and 20 vertical sigma levels. Using the time integration methods, the LBM was run up to 30 days, and the variable (i.e.,  
470 zonal wind, meridional wind and vertical velocity) on the last day (i.e., day 30) was taken as the steady response to the prescribed diabatic heating over southern China.

All composite maps were obtained from the average of each individual case.

### 3 Weather patterns related to heavy haze events on the NCP

Ding and Li (2017) investigated 30 extreme winter rainfall events associated with the subtropical westerly jet waveguide  
475 over southern China. From 19 rainfall events between 1985 and 2015 and the visibility observation data analysed in this study, we found 13 periods when the NCP experienced a pollution episode at the same time that heavy rainfall occurred in southern China (Table 1; Fig. 2). We took these 13 episodes as representative examples of the occurrence of haze over the NCP when that coincided with periods of heavy rainfall over southern China and defined them as South Rainfall–North Haze (hereafter, SR–NH) events. When rain fell over southern China, the probability of a haze event over the NCP during  
480 our research period of 1985–2015 was 68.42% under the similar background of atmospheric circulation. Details of these 13 SR–NH events are shown in Fig. 2 and Table 1. For the events studied here, there was evident precipitation in southern China, with unfixed rainfall areas (Ding and Li, 2017). At the same time, significant haze was trapped on the NCP, with poor visibility ( $<10$  km) over large areas, which is similar to the conditions described by An et al. (2020). In particular, more  
485 intense and widespread haze events occurred over the NCP on 22–24 December 2007, 1–5 January 1992, and 12–17 January 2012. A natural question that arises: what kind of atmospheric circulation regulates the weather phenomena associated with SR–NH events?

Figure 3 shows the composite anomalous air temperature at 1000 hPa, the absolute values of relative humidity at 925 hPa, and the anomalous wind vectors at 1000 hPa for the 13 SR–NH events. The positive air temperature anomaly over the NCP, which is caused by warmer and humid airflow from the low-level western North Pacific and transported by the easterly wind  
490 anomaly (Fig. 3a and c), creates favorable moisture conditions for the hygroscopic growth of haze particles, and further



deteriorates haze in the NCP (Ding et al., 2017). Additionally, relative humidity over China shows a triode pattern, with low values over the NCP ( $\leq 80\%$ ), meaning that these haze cases are haze rather than haze-fog (An et al., 2020). However, the relative humidity over southern China is close to 100%, and this is the result of the southwesterly airflow along the coast of southern China and the rainfall (Figs 2, 3b, c and 4b). The anomalous easterlies on the eastern side of the NCP not only  
495 transport warm and moist air that promotes the development of haze over the NCP, but they also weaken the **East Asian winter monsoon** (An et al., 2020), which is not conducive to the horizontal diffusion of haze (Fig. 3c).

To illustrate the reasons for the above changes in the meteorological factors, we next consider large-scale circulation. The composite map of the meridional wind anomaly reveals a substantial wave train with alternate positive and negative meridional wind anomalies at 200 hPa over the mid-latitudes of the Northern Hemisphere (Fig. 4a). This circulation pattern  
500 is suggestive of a Rossby wave train emanating from the North Atlantic (Li and Sun, 2015; Ding and Li, 2017; An et al., 2020; Li et al., 2020; Huang et al., 2020). According to the Rossby wave theory (Hoskins and Ambrizzi, 1993), the subtropical westerly jet, as a waveguide, allows the Rossby wave to arrive at the NCP (Fig. 4a). The wave activity fluxes show this wave train extending eastwards from the North Atlantic to eastern Europe, then southeastwards to Arabia, the Tibetan Plateau, and finally to the NCP (Fig. 4a), indicating that atmospheric circulation over the NCP is regulated by this  
505 wave train. As a result, there is a prominent anticyclonic anomaly over the NCP (Fig. 4b), in which agrees with the analysis of An et al. (2020). At 500 hPa, the anomalies are similar to the negative phase of the **Eurasian teleconnection (EU)**, although they are shifted south and west of the canonical position of the three centers of the EU pattern (Wallace and Gutzler, 1981) (Fig. 4b). This negative EU-like pattern is not conducive to the development of the **East Asian winter monsoon** (An et al., 2020), and this further encourages the development of heavy haze over the NCP. In addition, the AANA related to EU-  
510 like pattern also supports haze development over the NCP via the anomalous descending motion and southerly wind along the east coast of China (Figs 3c and 4b). In addition, the anomalous southwesterly airflow along the coast of southern China transports large amounts water vapor to this area, and is one of the conditions that leads to the heavy rainfall over southern China (Li and Sun, 2015; Ding and Li, 2017).

Previous studies have demonstrated that the convergence and divergence anomalies in the upper troposphere can be regarded  
515 as an effective Rossby wave source for the stationary Rossby wave (Hoskins and Ambrizzi, 1993; Branstator, 2002; Watanabe, 2004; Chen et al., 2020). The strong divergence causes the rainfall in southern China, and is located at 200 hPa (Li and Sun, 2015; Ding and Li, 2017; An et al., 2020), but does is also act as the Rossby wave source to strengthen the Rossby wave along the subtropical westerly jet waveguide? The composite map of the Rossby wave source for SR-NH events reveals a significant negative Rossby wave source in the upper troposphere over southern China around  $25^{\circ}$ – $30^{\circ}$  N,  
520  $110^{\circ}$ – $120^{\circ}$  E (Fig. 5), where positive precipitation and strong ascending motion anomalies are located (Figs 2 and 6b). Therefore, the divergence anomalies in the upper troposphere (Fig. 7a) associated with positive precipitation and anomalous ascending motion (Figs 2 and 6a, b) play a crucial role in the formation of the strong negative Rossby wave source over southern China, which excites the Rossby wave that propagates to the downstream regions. This means that there is a

positive feedback process involving subtropical westerly jet waveguide-rainfall over southern China. The rainfall over  
525 southern China is largely caused by the subtropical westerly jet waveguide (Li and Sun, 2015; Ding and Li, 2017; Li et al.,  
2020), which would in turn would strengthen vertical motion and high-level divergence by an intensification of latent heat  
release, generating a Rossby wave source, and hence strengthen the wave train along the subtropical westerly jet. This  
process reinforces the Rossby wave that originated from the North Atlantic. Wang et al. (2019) and An et al. (2020) found  
that such waves can account for haze over the NCP. The ascending motion over southern China that is related to the diabatic  
530 heating caused by the rainfall will be examined further below.

#### 4 Possible physical mechanisms driving SR–NH events: the role of rainfall-induced diabatic heating

In the previous section, we presented a diagnostic analysis of the atmospheric circulation during periods of haze over the  
NCP. We now focus on the influence of circulation related to diabatic heating on haze formation over the NCP. The  
composite sections show when precipitation occurred in southern China, and that it was accompanied by a strong vertical  
535 ascending motion (Fig. 6a, b). At the same time, the NCP was controlled by an obvious descending motion (Fig. 6a, c),  
which was related to the ascending motion over southern China and forms the **local north–south circulation system** together  
with the ascending motion in southern China (Fig. 6a). The descending motion over the NCP develops with the AANA as  
shown in Fig. 4b. The divergent wind, as well as the velocity potential, also confirmed that there was strong divergence near  
200 hPa over southern China and strong convergence in the northern China (Fig. 7a). The latitude–height cross section of the  
540 stream function and relative vorticity shows that there was strong convergence in the middle- to upper levels of the  
troposphere, but weak divergence (strong convergence) at lower (higher) levels over the NCP (Fig. 7b), and this was  
responsible for the descending motion and not conducive to the diffusion of haze. The centers of the convergence and  
divergence over southern China were the opposite to those over the NCP (Fig. 7b), which is the typical circulation pattern  
that accompanied rainfall (Li and Sun, 2015). The ascending motion over southern China is not only related to the  
545 subtropical westerly jet waveguide (Ding and Li, 2017), but may also related to the diabatic heating caused by the rainfall.

The diabatic heating in the atmosphere caused by precipitation may intensify the local ascending motion (Wang et al., 2019;  
Xu et. al., 2020). To estimate the diabatic heating produced by rainfall extremes in southern China, we calculated  $Q_1$   
quantities using Eq. 3 as described above. Figure 8 shows the composite  $Q_1$  during the period of heavy rainfall in southern  
China. An obviously positive  $Q_1$  appears in southern China when rainfall occurs, with the maximum value of  $Q_1$  near  $26^\circ$  N,  
550  $115^\circ$  E (Fig. 8a). Short-wave radiation from the sun rarely reaches the lower troposphere during rainfall because it is blocked  
by the clouds; therefore, a positive value for  $Q_1$  indicates the rainfall process may release large amounts of heat. To  
investigate the vertical distribution of  $Q_1$ , we calculated the average value of  $Q_1$  value between 1000 and 100 hPa over the  
domain  $20^\circ$ – $30^\circ$  N,  $110^\circ$ – $120^\circ$  E. Figure 9b shows that the maximum value of  $Q_1$  ( $2.6 \text{ K day}^{-1}$ ) occurred at 500 hPa (Fig. 8b).  
The results shown in Fig. 9a also confirm that the rainfall acts as a heat source. Analyzing the distribution of  $Q_1$  may help to

555 identify the specific heating processes that are occurring in the atmosphere (Yanai et al., 1973). The above analysis corroborates that the rainfall process does release a lot of heat, which may further encourage ascending motion.

To further validate the above-mentioned rainfall–heating circulation, a numerical experiment was conducted. The results outlined above indicate that the **local north–south circulation system** seems to be closely associated with the diabatic heating over southern China. Using the LBM, we performed a numerical simulation to complement the observational results and test  
560 the plausibility of the proposed haze–rainfall link. This numerical experiment simulated the atmospheric response to heat forcing induced by heavy rainfall in southern China (Fig. 9a). The experiment was run with diabatic heating centered over southern China (26° N, 115° E), which essentially matched the maximum value and variance of  $Q_1$ , and the heavy rainfall located as shown in Fig. 8a. The maximum heating, with an amplitude of  $2 \text{ K day}^{-1}$ , was set at 500 hPa (Fig. 9b). Figure 9 illustrates the 300-hPa wind response to the diabatic heating over southern China. An obvious divergence in the wind vectors  
565 occurs over eastern China. The whole layer is divergent, which means that diabatic heating is conducive to upward motion, and the airflow diffuses northwards at 200 hPa.

The **local north–south circulation system** simulated by the LBM is similar to the observed spatial pattern of the **local north–south circulation system** (Figs 6 and 10), both of which are broadly similar to the results obtained by An et al. (2020). As depicted in Fig. 11b, the upper-level negative and low-level positive relative vorticity over southern China (20°–30° N)  
570 indicates that the atmosphere is strongly baroclinic, with an anticyclonic circulation in the upper levels and a cyclonic circulation at lower levels over southern China. The direct product of this circulation is strong ascending motion over southern China. Meanwhile, upper-level convergence and low-level weak divergence over the NCP supports descending motion there, which is conducive to haze. In addition, at 200 hPa, the positive relative vorticity located over the NCP reinforces the AANA (Fig. 11a). In summary, this LBM experiment further confirms that the circulation related to the  
575 rainfall over southern China plays an obvious assisting role in maintaining haze over the NCP.

From our earlier discussion, it is clear that the diabatic heat released by rainfall over southern China has a significant effect on the ascending motion, except for large-scale circulation background; i.e., the subtropical westerly jet waveguide and south branch trough suggested by Li and Sun (2015). However, a crucial issue that remains to be addressed is which  
580 contributes more to the vertical movement? In reality, in a moist atmosphere, the vertical motion depends not only on dynamic forcing by large-scale perturbations, but also on the driving by the latent heating released from convection (Nie et al., 2020). To quantify the contribution of vertical motion due to rainfall heating, we calculated the components of the  $\omega$  equation as described in Eq. 4. First, we find that negative (positive)  $\omega$  values occur mainly over southern China (the NCP), which indicates that southern China is controlled by ascending (descending) motion (Fig. 12). Both the ascending motion over southern China and the descending motion over the NCP are strongest at 500 hPa (Fig. 12). The top panel in Fig. 12  
585 presents the diabatic heating term, which in agreement with that of  $\omega$ , especially in the mid–high levels of the troposphere (i.e., 300 and 500 hPa), whereas the dry dynamic forcing term (middle panel in Fig. 12) clearly differs from  $\omega$ , and its values

in the lower level of troposphere (below 700 hPa) are very weak and unlikely to be responsible for enhancing vertical motion (Fig. 12). This means that the strengthened ascending motion caused by the subtropical westerly jet waveguide enhances the production of rainfall over southern China, resulting in increased diabatic heating, which in turn reinforces the ascending motion and hence forms a positive feedback that links the diabatic heating to the ascending motion when there is a plentiful supply of moisture. The above analysis again confirms that diabatic heating related to rainfall plays a crucial role in the ascending motion over southern China, which in turn maintains the **local north–south circulation system, leading to a shallow atmospheric boundary layer height, finally aggravates the haze pollution over the NCP (not shown).**

## 5 Discussion and conclusions

Our study investigated the mechanisms associated with production over the NCP related to rainfall heating over southern China. We found that the appearance of **some of haze events** over the NCP is the product of the circulation associated with rainfall over southern China in conjunction with two wave trains along the subtropical westerly jet and polar front jet waveguides. The extreme rainfall events over southern China analyzed in this study were caused mainly by the subtropical westerly jet waveguide (Li and Sun, 2015; Ding and Li, 2017), and the diabatic heat related to it induces the secondary circulation (referred to as the **local north–south circulation system** in this paper). On the one hand, this heating strengthens the ascending motion over southern China and the descending motion over the NCP (Fig. 13). On the other hand, this heating stimulates the wave train as the Rossby wave source and strengthens the background subtropical westerly jet wave train. These changes eventually lead to the strengthening of the anomalous anticyclone in northeast Asia, resulting in the strong descending movement, weak northerly wind, and warm and moisture-laden flow over the NCP. As a consequence, heavy haze is maintained over the NCP.

When the AANA over the NCP moves a little to the east (Fig. 14b), heavy rainfall also occurs in southern China and triggers a similar the **local north–south circulation system** (not shown), but there is then no haze (i.e., visibility was  $>10$  km) over the NCP (i.e., a SR–noNH event). This implies that the AANA is one of the important factors in the occurrence of severe haze events over the NCP (Fig. 4), and this agrees with the results of Chen et al. (2019) and An et al. (2020). In addition,  $PM_{2.5}$  concentrations were lower (most areas below  $120 \mu\text{g m}^{-3}$ ) in the first seven days during nine SR–noNH events (Fig. 15). This implies that emissions are the source of haze over the NCP, and meteorological factors worsen haze (e.g., Wang et al., 2015; Stirnberg et al., 2021). **A comprehensive understanding of why there is no haze in the NCP despite some rainfall in southern China (6 SR–noNH events) needs to be added in the future.**

In addition to rainfall over southern China associated with the subtropical westerly jet waveguide, rainfall is also associated with ENSO (Ma et al., 2018). Therefore, ENSO may also be, except for the westerly jet waveguide, another potential factor in haze production over the NCP and rainfall over southern China. For instance, there has been rainfall over southern China and haze over the NCP during El Niño years (i.e., 1988, 1992, 2007, and 2015). The present study does not consider the role

of ENSO with respect to rainfall over southern China and haze over the NCP, but this will be the focus of future work. The complex interconnections among atmospheric systems make it difficult to determine whether any single factor is the dominant control on haze production over the NCP, and it is possible that the synergistic effects of many influencing factors may play a more important role in the occurrence of haze. As mentioned in the introduction, there are many meteorological factors that play an important role in haze production in northern China. Previous in-depth studies have considered various aspects of the formation mechanisms of haze in northern China; i.e., ENSO (Yu et al., 2020; Zhang et al., 2020), the Arctic Oscillation (Cai et al., 2017), and Arctic sea ice (Yin et al., 2019a, b; Li and Yin, 2020). However, whether such factors have a synergistic effect on haze production (e.g., Arctic sea ice and the tropical ocean) has not been considered here but would be a worthwhile focus for a future study.

*Data availability.* The visibility observational data are available at the China Meteorological Administration (<http://data.cma.cn/>, 2017), the reanalysis dataset is available at NCEP/NCAR (<https://www.esrl.noaa.gov/psd/data/gridded/>, NCEP/NCAR, 2020), and the daily PM<sub>2.5</sub> concentration dataset for China for the period 1980–2019 is available at <https://zenodo.org/record/4293239#.YJI3J8DiuUn> (last access: 12 April 2021).

*Author contribution.* XA, LS and LC designed the experiments and carried them out. XD and YL developed the model code and performed the simulations. XA downloaded and analysed the reanalysis data and prepared all the figures. XD prepared the manuscript with contributions from all co-authors. LS, WC, JHuangfu revised the manuscript.

*Competing interests.* The authors declare that they have no conflict of interest.

*Acknowledgement.* This research was supported by the National Natural Science Foundation of China (grant no. 41975008) and Fundamental Research Funds for the Central Universities (grant no. 201961004). All the authors are very grateful to the China Meteorological Administration (<http://data.cma.cn/>, last access: 12 November 2017) and NCEP/NCAR (<https://www.esrl.noaa.gov/psd/data/gridded/>, last access: 20 December 2020) for data used in this study.

## References

- An, X. D., Sheng, L. F., Liu, Q., Li, C., Gao, Y., and Li, J. P.: The combined effect of two westerly jet waveguides on heavy haze in the North China Plain in November and December 2015, *Atmos. Chem. Phys.*, 20, 4667–4680, <https://doi.org/10.5194/acp-20-4667-2020>, 2020.
- Callahan, C. W., and Mankin, J. S.: The influence of internal climate variability on projections of synoptically driven Beijing haze, *Geophys. Res. Lett.*, 46, e2020GL088548, <https://doi.org/10.1029/2020GL088548>, 2020.
- Cai, W., Li, K., Liao, H., Wang, H. J., and Wu, L. X.: Weather conditions conducive to Beijing severe haze more frequent under climate change, *Nat. Clim. Change*, 7, 257–262, <https://doi.org/10.1038/nclimate3249>, 2017.

- China Meteorological Administration: QXT 113-2010 Observation and forecasting levels of haze, China Meteorol. Press, Beijing, China, 2010 (in Chinese).
- 650 CMA: China ground observation data sets, available at: <http://data.cma.cn/>, last access: 12 November 2017 (in Chinese).
- Chen, H., and Wang, H.: Haze Days in North China and the associated atmospheric circulations based on daily visibility data from 1960 to 2012, *J. Geophys. Res. Atmos.*, 120, 5895–5909, <https://doi.org/10.1002/2015JD023225>, 2015.
- Chen, G., Li, S., Zhang, Y., Zhang, W., Li, D., Wei, X., He, Y., Bell, M. L., Williams, G., Marks, G. B., Jalaludin, B., Abramson, M. J., and Guo, Y.: Effects of ambient PM<sub>1</sub> air pollution on daily emergency hospital visits in China: an  
655 epidemiological study, *Lancet Planet. Heal.*, 1, 221–229, [https://doi.org/10.1016/S2542-5196\(17\)30100-6](https://doi.org/10.1016/S2542-5196(17)30100-6), 2017.
- Chen, S., Guo, J., Song, L., Cohen, J. B., and Wang, Y.: Temporal disparity of the atmospheric systems contributing to interannual variation of wintertime haze pollution in the North China Plain, *Int. J. Climatol.*, 40, 128–144, <https://doi.org/10.1002/joc.6198>, 2020.
- Dang, R. and Liao, H.: Severe winter haze days in the Beijing–Tianjin–Hebei region from 1985 to 2017 and the roles of  
660 anthropogenic emissions and meteorology, *Atmos. Chem. Phys.*, 19, 10801–10816, <https://doi.org/10.5194/acp-19-10801-2019>, 2019.
- Ding, F. and Li, C.: Subtropical westerly jet waveguide and winter persistent heavy rainfall in south China, *J. Geophys. Res. Atmos.*, 122, 7385–7400, <https://doi.org/10.1002/2017JD026530>, 2017.
- Ding, Y., Wu, P., Liu, Y., and Song, Y.: Environmental and Dynamic Conditions for the Occurrence of Persistent Haze  
665 Events in North China, *Engineering*, 3, 266–271, <https://doi.org/10.1016/J.ENG.2017.01.009>, 2017.
- Feng, J., Li, J., Liao, H., and Zhu, J.: Simulated coordinated impacts of the previous autumn North Atlantic Oscillation (NAO) and winter El Niño on winter aerosol concentrations over eastern China, *Atmos. Chem. Phys.*, 19, 10787–10800, <https://doi.org/10.5194/acp-19-10787-2019>, 2019.
- Gao, M., Carmichael, G. R., Saide, P. E., Lu, Z., Yu, M., Streets, D. G., and Wang, Z.: Response of winter fine particulate  
670 matter concentrations to emission and meteorology changes in North China, *Atmos. Chem. Phys.*, 16, 11837–11851, <https://doi.org/10.5194/acp-16-11837-2016>, 2016.
- Guo, Y. Y., Wen, Z. P., Chen, R. D., Li, X. Z., and Yang, X. Q.: Effect of boreal spring precipitation anomaly pattern change in the late 1990s over tropical Pacific on the atmospheric teleconnection, *Clim. Dyn.*, 52(1–2), 401–416, <https://doi.org/10.1007/s00382-018-4149-8>, 2019.
- 675 Han, S. and Sun, J.: Connection between the November Snow Cover over Northeast Asia and the Following January Precipitation in Southern China, *Int. J. Climatol.*, 41, 2553–2567, <https://doi.org/10.1002/joc.6974>, 2021.
- Hoskins, B. J., and Ambrizzi, T.: Rossby Wave Propagation on a Realistic Longitudinally Varying Flow, *J. Atmos. Sci.*, 50 (12), 1661–1671, [https://doi.org/10.1175/1520-0469\(1993\)050<1661:RWPOAR>2.0.CO;2](https://doi.org/10.1175/1520-0469(1993)050<1661:RWPOAR>2.0.CO;2), 1993.
- Hu, P., Chen, W., Chen, S. F., Liu, Y. Y., Huang, R. P., and Dong, S. R.: Relationship between the South China Sea summer  
680 monsoon withdrawal and September–October rainfall over southern China, *Clim. Dyn.*, 54, 713–726, <https://doi.org/10.1007/s00382-019-05026-2>, 2020.

- Hughes, H. E., Morbey, R., Fouillet, A., Caserio-Schönemann, C., Dobney, A., Hughes, T. C., Smith, G. E., and Elliot, A. J.: Retrospective observational study of emergency department syndromic surveillance data during air pollution episodes across London and Paris in 2014, *BMJ Open*, 8, 1–12, <https://doi.org/10.1136/bmjopen-2017-018732>, 2018.
- 685 Kanamitsu, M., Ebisuzaki, W., Woollen, J., Yang, S.-K., Hnilo, J. J., Fiorino, M., and Potter, G. L.: NCEP-DOE AMIP-II Reanalysis (R-2), *B. Am. Meteorol. Soc.*, 83, 1631–1643, 2002.
- Lelieveld, J., Klingmüller, K., Pozzer, A., Pöschl, U., Fnais, M., Daiber, A., and Münzel, T.: Cardiovascular disease burden from ambient air pollution in Europe reassessed using novel hazard ratio functions, *Eur. Heart J.*, 40, 1–7, <https://doi.org/10.1093/eurheartj/ehz135>, 2019.
- 690 Li, C. and Sun, J. L.: Role of the subtropical westerly jet waveguide in a southern China heavy rainstorm in December 2013, *Adv. Atmos. Sci.*, 32, 601–612, <https://doi.org/10.1007/s00376-014-4099-y>, 2015.
- Li, H., Yang, Y., Wang, H., Li, B., Wang, P., Li, J., and Liao, H.: Constructing a spatiotemporally coherent long-term PM<sub>2.5</sub> concentration dataset over China during 1980–2019 using a machine learning approach, *Sci. Total Environ.*, 765, 144263, <https://doi.org/10.1016/j.scitotenv.2020.144263>, 2021.
- 695 Li, M., Yao, Y., Simmonds, I., Luo, D., Zhong, L., and Pei, L.: Atmospheric transmission patterns which promote persistent winter haze over Beijing, *Atmos. Chem. Phys. Discuss.* [preprint], <https://doi.org/10.5194/acp-2020-823>, in review, 2021.
- Li, Y., and Yin, Z.: Melting of Perennial Sea Ice in the Beaufort Sea Enhanced Its Impacts on Early-Winter Haze Pollution in North China after the Mid-1990s, *J. Clim.*, 33(12), 5061–5080, <https://doi.org/10.1175/JCLI-D-19-0694.1>, 2020.
- Li, Y., Zhang, J., Sailor, D. J., and Ban-Weiss, G. A.: Effects of urbanization on regional meteorology and air quality in  
700 Southern California, *Atmos. Chem. Phys.*, 19, 4439–4457, <https://doi.org/10.5194/acp-19-4439-2019>, 2019.
- Li, X., Wen, Z., and Huang, W.: Modulation of South Asian Jet Wave Train on the Extreme Winter Precipitation over Southeast China: Comparison between 2015/16 and 2018/19, *J. Clim.*, 33 (10), 4065–4081, <https://doi.org/10.1175/JCLI-D-19-0678.1>, 2020.
- Liu, Q., Sheng, L., Cao, Z., Diao, Y., Wang, W., and Zhou, Y.: Dual effects of the winter monsoon on haze-fog variations in  
705 eastern China, *J. Geophys. Res. Atmos.*, 122, 5857–5869, <https://doi.org/10.1002/2016JD026296>, 2017.
- Lu, R., and Lin, Z.: Role of subtropical precipitation anomalies in maintaining the summertime meridional teleconnection over the western North Pacific and East Asia, *J. Clim.*, 22(8), 2058–2072, <https://doi.org/10.1175/2008JCLI2444.1>, 2009.
- Ma, T. J., Chen, W., Feng, J., and Wu, R. G.: Modulation effects of the East Asian winter monsoon on El Niño-related rainfall anomalies in southeastern China, *Sci. Rep.*, 8, 14107, <https://doi.org/10.1038/s41598-018-32492-1>, 2018.
- 710 NCEP/NCAR: NCEP/NCAR Reanalysis data sets, available at: <http://www.esrl.noaa.gov/psd/data/gridded/data.ncep.reanalysis.html>, last access: 20 December 2020.
- Nie, J., Dai, P. X., and Sobel, A. H.: Dry and moist dynamics shape regional patterns of extreme precipitation sensitivity, *P. Natl. Acad. Sci. USA*, 117(16), 8757–8763, <https://doi.org/10.1073/pnas.1913584117>, 2020.
- Quan, J., Zhang, Q., He, H., Liu, J., Huang, M., and Jin, H.: Analysis of the formation of fog and haze in North China Plain  
715 (NCP), *Atmos. Chem. Phys.*, 11, 8205–8214, <https://doi.org/10.5194/acp-11-8205-2011>, 2011.



- Sampe, T., and Xie, S.-P.: Large-scale dynamics of the Meiyu-Baiu rain band: Environmental forcing by the westerly jet, *J. Clim.*, 23, 113–134, <https://doi.org/10.1175/2009JCLI3128.1>, 2010.
- Sardeshmukh, P. D., and Hoskins B. J.: The Generation of global rotational flow by steady idealized tropical divergence, *J. Atmos. Sci.*, 45, 1228–1251, [https://doi.org/10.1175/1520-0469\(1988\)045<1228:TGOGRF>2.0.CO;2](https://doi.org/10.1175/1520-0469(1988)045<1228:TGOGRF>2.0.CO;2), 1988.
- 720 Stirnberg, R., Cermak, J., Kotthaus, S., Haeffelin, M., Andersen, H., Fuchs, J., Kim, M., Petit, J.-E., and Favez, O.: Meteorology-driven variability of air pollution (PM1) revealed with explainable machine learning, *Atmos. Chem. Phys.*, 21, 3919–3948, <https://doi.org/10.5194/acp-21-3919-2021>, 2021.
- Takaya, K., and Nakamura, H.: A formulation of a phase-independent wave-activity flux for stationary and migratory quasigeostrophic eddies on a zonally varying basic flow, *J. Atmos. Sci.*, 58(6), 608–627, [https://doi.org/10.1175/1520-0469\(2001\)058<0608:AFOAPI>2.0.CO;2](https://doi.org/10.1175/1520-0469(2001)058<0608:AFOAPI>2.0.CO;2), 2001.
- 725 Wallace, J. M. and Gutzler, D. S.: Teleconnections in the geopotential height field during the Northern Hemisphere winter, *Mon. Wea. Rev.*, 109, 784–812, [https://doi.org/10.1175/15200493\(1981\)109<0784:TITGHF>2.0.CO;2](https://doi.org/10.1175/15200493(1981)109<0784:TITGHF>2.0.CO;2), 1981.
- Wang, J., Zhu, Z., Qi, L., Zhao, Q., He, J., and Wang, J. X. L.: Two pathways of how remote SST anomalies drive the interannual variability of autumnal haze days in the Beijing–Tianjin–Hebei region, China, *Atmos. Chem. Phys.*, 19, 1521–
- 730 1535, <https://doi.org/10.5194/acp-19-1521-2019>, 2019.
- Wang, Y. H., Liu, Z. R., Zhang, J. K., Hu, B., Ji, D. S., Yu, Y. C., and Wang, Y. S.: Aerosol physicochemical properties and implications for visibility during an intense haze episode during winter in Beijing, *Atmos. Chem. Phys.*, 15, 3205–3215, <https://doi.org/10.5194/acp-15-3205-2015>, 2015.
- Watanabe, M., and Kimoto, M.: Atmosphere-ocean thermal coupling in the North Atlantic: a positive feedback, *Q. J. R. Meteorol. Soc.*, 126(570), 3343–3369, <https://doi.org/10.1002/qj.49712657017>, 2000.
- Xu, K., Miao, H.-Y., Liu, B., Tam, C.-Y., and Wang, W.: Aggravation of record-breaking drought over the mid-to-lower reaches of the Yangtze River in the postmonsoon season of 2019 by anomalous Indo-Pacific oceanic conditions, *Geophys. Res. Lett.*, 47, e2020GL090847, <https://doi.org/10.1029/2020GL090847>, 2020.
- Xu, B., Gu, Z. Y., Wang, L., Hao, Q. Z., Wang, H. Z., Chu, G. Q., Lv, Y. W., and Jiang, D. B.: Global warming increases the incidence of haze days in China, *J. Geophys. Res. Atmos.*, 124, 6180–6190, <https://doi.org/10.1029/2018JD030119>, 2019.
- 740 Yanai, M., Esbensen, S., and Chu, J.-H.: Determination of Bulk Properties of Tropical Cloud Clusters from Large-Scale Heat and Moisture Budgets, *J. Atmos. Sci.*, 30, 611–627, [https://doi.org/10.1175/1520-0469\(1973\)030<0611:DOBPOT>2.0.CO;2](https://doi.org/10.1175/1520-0469(1973)030<0611:DOBPOT>2.0.CO;2), 1973.
- Yang, Y., Liao, H., and Lou, S.: Increase in winter haze over eastern China in recent decades: Roles of variations in meteorological parameters and anthropogenic emissions, *J. Geophys. Res. Atmos.*, 121, 13050–13065, <https://doi.org/10.1002/2016JD025136>, 2016.
- 745 Yang, Y.: Constructing a spatiotemporally coherent long-term PM2.5 concentration dataset over China during 1980–2019 using a machine learning approach (Version 1), <http://doi.org/10.5281/zenodo.4293239>, 2020, last access: 12 April 2021.

- Yin, Z., Li, Y., and Wang, H.: Response of early winter haze in the North China Plain to autumn Beaufort sea ice, *Atmos. Chem. Phys.*, 19, 1439–1453, <https://doi.org/10.5194/acp-19-1439-2019>, 2019, a.
- Yin, Z., Wang, H., and Ma, X.: Possible Relationship between the Chukchi Sea Ice in the Early Winter and the February Haze Pollution in the North China Plain, *J. Clim.*, 32(16), 5179–5190, <https://doi.org/10.1175/JCLI-D-18-0634.1>, 2019, b.
- Yu, X., Wang, Z., Zhang, H., He, J., and Li, Y.: Contrasting impacts of two types of El Niño events on winter haze days in China's Jing-Jin-Ji region, *Atmos. Chem. Phys.*, 20, 10279–10293, <https://doi.org/10.5194/acp-20-10279-2020>, 2020.
- 755 Zhang, Y., Yin, Z., and Wang, H.: Roles of climate variability on the rapid increases of early winter haze pollution in North China after 2010, *Atmos. Chem. Phys.*, 20, 12211–12221, <https://doi.org/10.5194/acp-20-12211-2020>, 2020.
- Zhong, W., Yin, Z., and Wang, H.: The relationship between anticyclonic anomalies in northeastern Asia and severe haze in the Beijing–Tianjin–Hebei region, *Atmos. Chem. Phys.*, 19, 5941–5957, <https://doi.org/10.5194/acp-19-5941-2019>, 2019.
- Zou, Y., Wang, Y., Xie, Z., Wang, H., and Rasch, P. J.: Atmospheric teleconnection processes linking winter air stagnation and haze extremes in China with regional Arctic sea ice decline, *Atmos. Chem. Phys.*, 20, 4999–5017, <https://doi.org/10.5194/acp-20-4999-2020>, 2020.
- 760 Zhang, Z., Gong, D., Mao, R., Qiao, L., Kim, S.-J., and Liu, S.: Possible influence of the Antarctic oscillation on haze pollution in North China, *J. Geophys. Res. Atmos.*, 124, 1307–1321, <https://doi.org/10.1029/2018JD029239>, 2019.
- Zhang, Y. Q., Ma, Z. K., Gao, Y., and Zhang, M. G.: Impacts of the meteorological condition versus emissions reduction on the PM<sub>2.5</sub> concentration over Beijing–Tianjin–Hebei during the COVID-19 lockdown, *Atmos. Oceanic Sci. Lett.*, <https://doi.org/10.1016/j.aosl.2020.100014>, 2020.
- 765 Zhang, G., Gao, Y., Cai, W., Leung, L. R., Wang, S., Zhao, B., Wang, M., Shan, H., Yao, X., and Gao, H.: Seesaw haze pollution in North China modulated by the sub-seasonal variability of atmospheric circulation, *Atmos. Chem. Phys.*, 19, 565–576, <https://doi.org/10.5194/acp-19-565-2019>, 2019.
- 770 Zhang, W., Hai, S., Zhao, Y., Sheng, L., Zhou, Y., Wang, W., and Li, W.: Numerical modeling of regional transport of P M<sub>2.5</sub> during a severe pollution event in the Beijing–Tianjin–Hebei Region in November 2015, *Atmos. Environ.*, 118393, <https://doi.org/10.1016/j.atmosenv.2021.118393>, 2021.
- Zhao, S., Li, J. and Sun, C.: Decadal variability in the occurrence of wintertime haze in central eastern China tied to the Pacific Decadal Oscillation, *Sci. Rep.*, 6, 27424, <https://doi.org/10.1038/srep27424>, 2016.

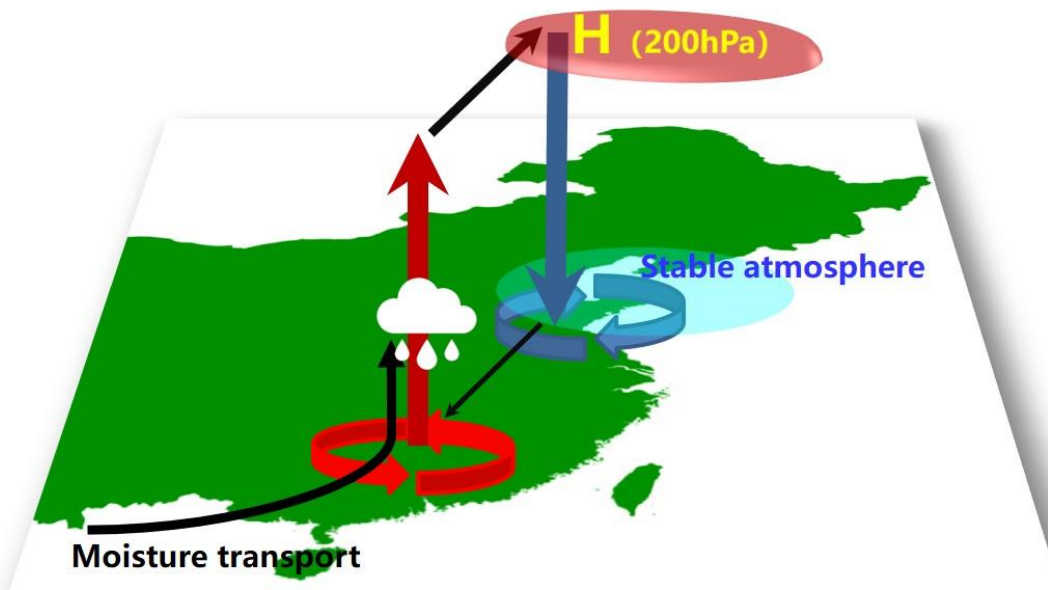

Figure 1: Schematic illustration of the [local north-south circulation system](#). The red (blue) circular arrow indicates the anomalous cyclone (anticyclone), the red (blue) vertical arrow indicates ascending (descending) motion, the thick black arrow indicates northward movement in the upper-level troposphere, H indicates the anticyclonic anomaly, and the white cloud indicates rainfall (see An et al. (2020) for caption details).

780

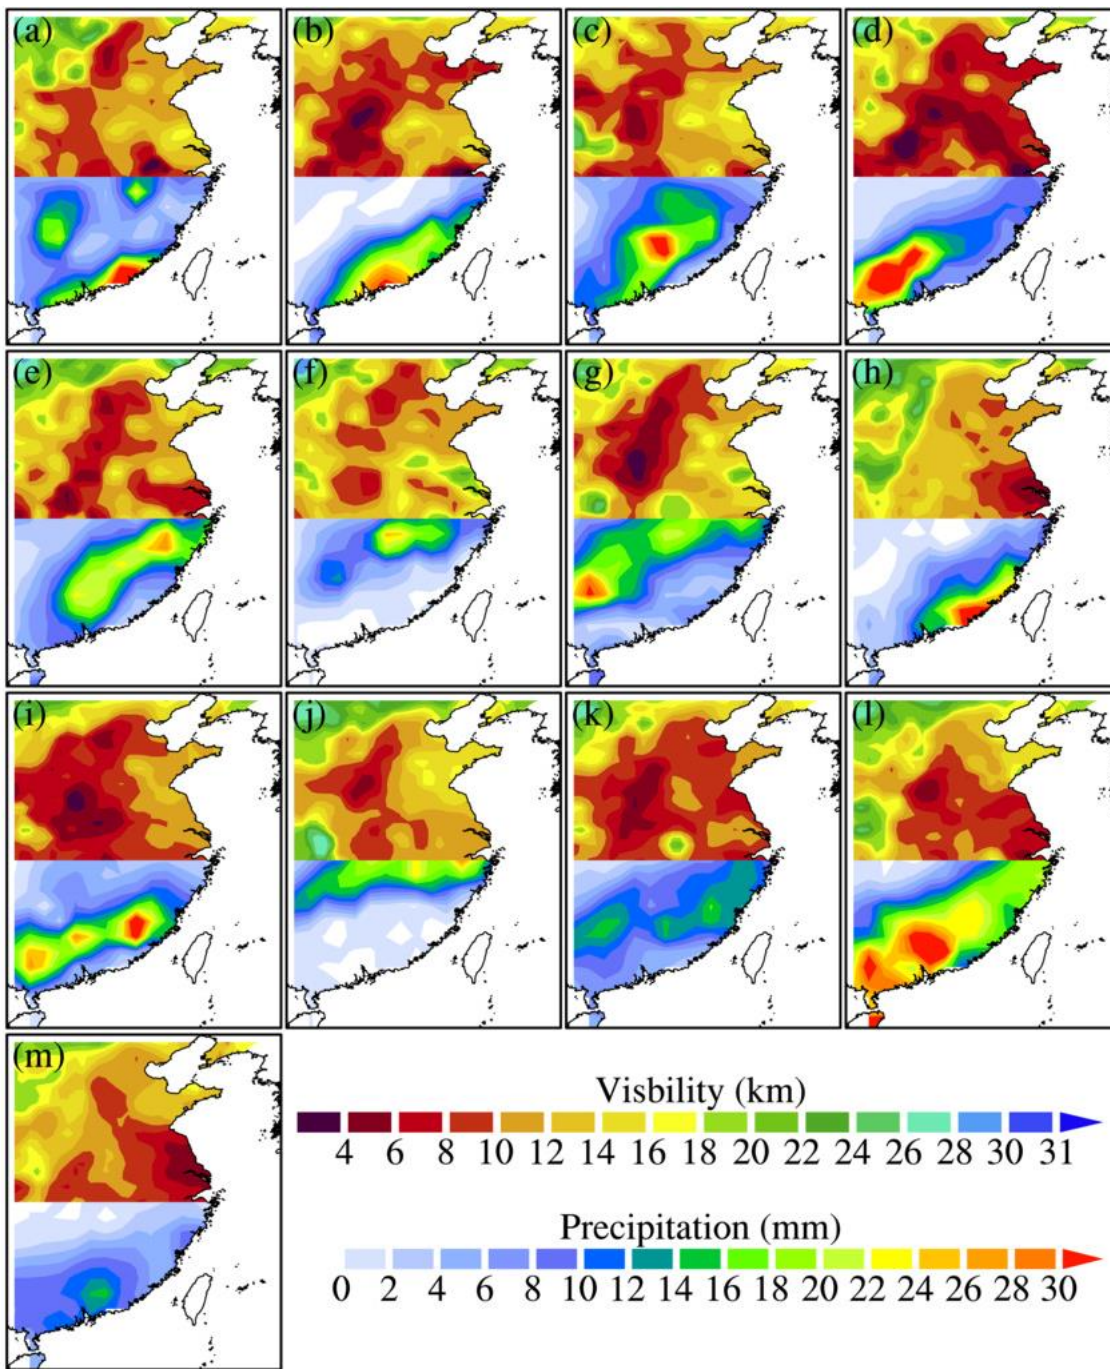

Figure 2: Daily mean visibility (shading, km d<sup>-1</sup>) over the NCP (30°-40° N, 112°-120° E) and precipitation (shading, mm d<sup>-1</sup>) in southern China (10°-20° N, 110°-120° E) for each SR-NH event. Panels (a)-(n) represent events 1-13, respectively, as described in Table 1.

785

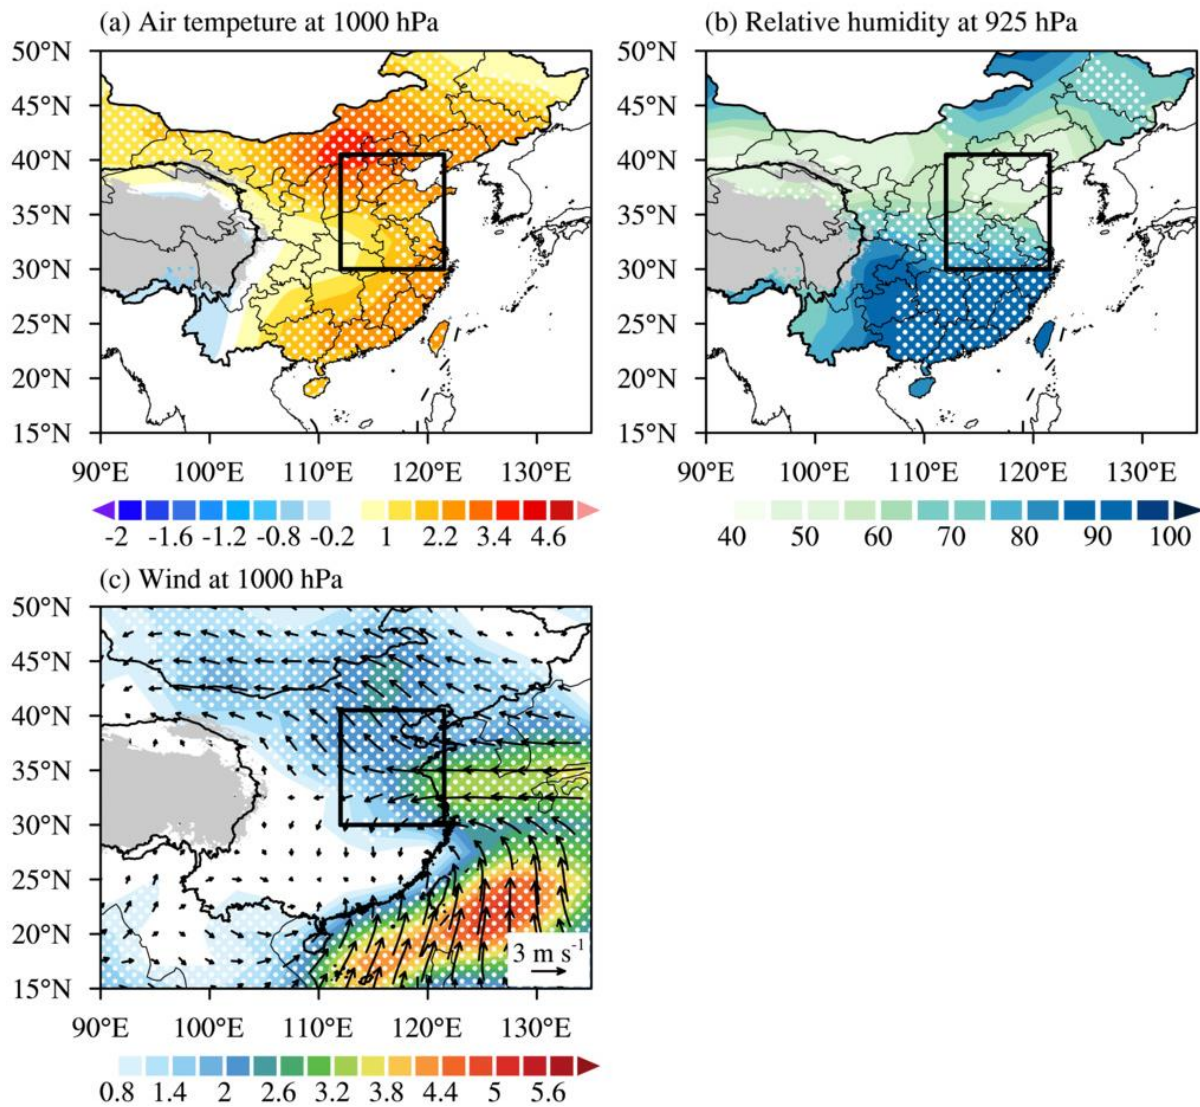

Figure 3: Composite (a) anomalous air temperature at 1000 hPa, (b) absolute values of relative humidity at 925 hPa, and (c) anomalous wind (arrows) and wind speed (shading,  $\text{m s}^{-1}$ ) at 1000 hPa for the 13 SR-NH events. The white dotted region indicates areas at the 99% confidence level based on the two-tailed Student's  $t$  test. The black box indicates the NCP ( $30^{\circ}$ – $40.5^{\circ}$  N,  $112^{\circ}$ – $121.5^{\circ}$  E) and the gray area is the Tibetan Plateau.

790



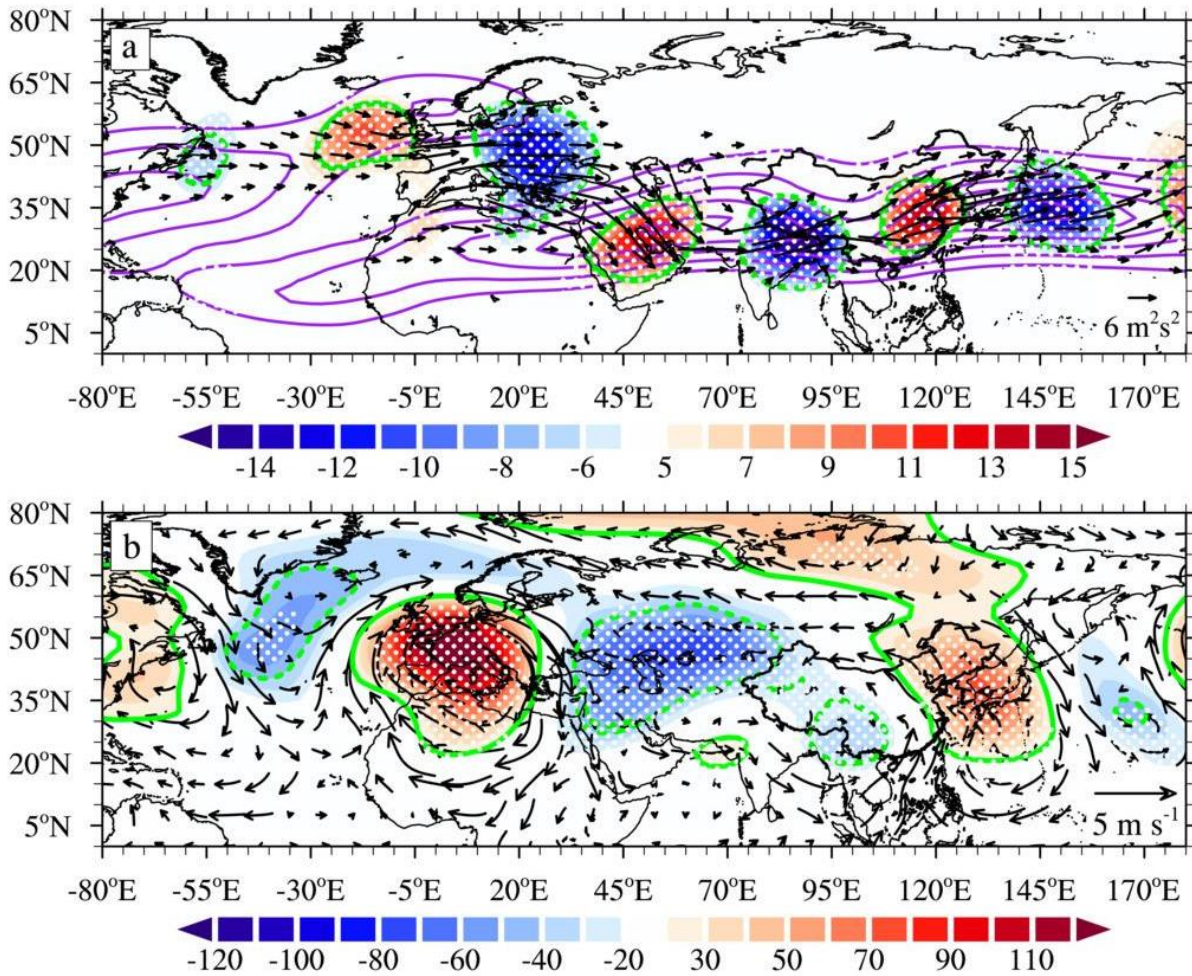

795 **Figure 4:** Composite map of (a) 200 hPa meridional wind anomalies (shading, unit:  $\text{m s}^{-1}$ , dashed and solid green contours for  $-6$  and  $7 \text{ m s}^{-1}$ , respectively), zonal wind (contours, unit:  $\text{m s}^{-1}$ ), and wave activity flux (vectors, unit:  $\text{m}^2 \text{s}^{-2}$ ), (b) 500 hPa geopotential height anomalies (shading, unit: gpm, dashed and solid green contours for  $-40$  and  $20$  gpm, respectively) and 850 hPa wind (vectors). White dotted regions indicate areas at the 99% confidence level based on the two-tailed Student's  $t$  test.

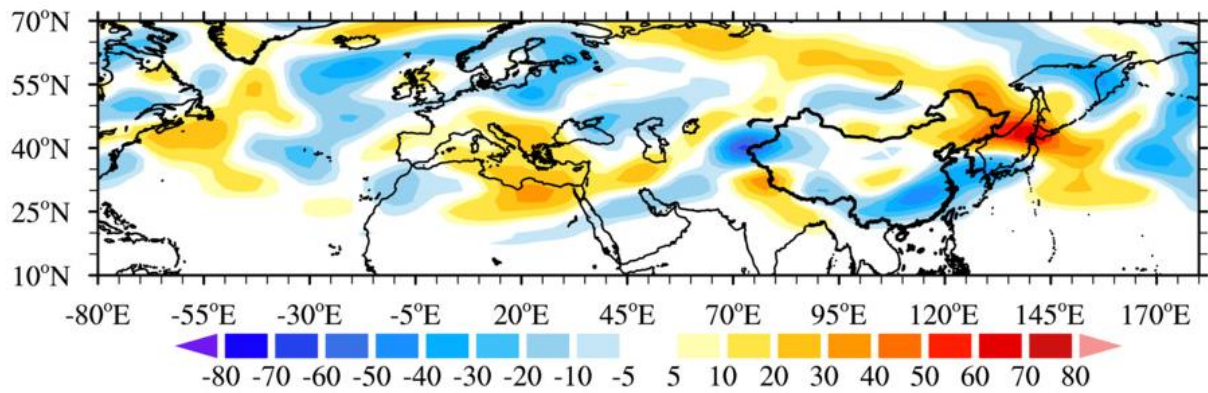

800 **Figure 5: Composite map of the Rossby wave source (shading, unit:  $s^{-2}$ ) at 200 hPa for the 13 SR-NH events. According to Eq. 4, the variables should be composited first, and then used to calculate the Rossby wave source, hence there is no  $t$ -test here.**



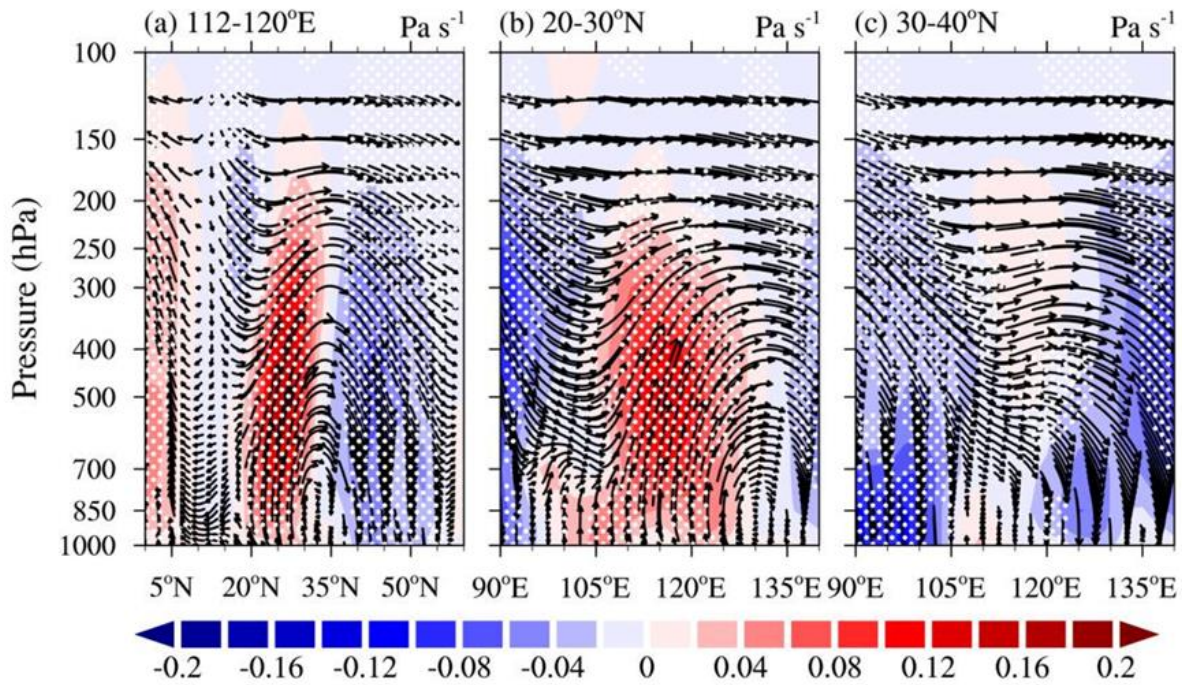

805 **Figure 6:** Composite sections of absolute values for the 13 SR–NH events: latitude–height sections of (a) vertical velocity (shading, unit:  $-1 \text{ Pa s}^{-1}$ ) and wind vectors ( $v$  and  $-\omega$ ) averaged over  $112^{\circ}\text{--}120^{\circ}$  E, and longitude–height cross sections of (b) vertical velocity (shading, unit:  $-1 \text{ Pa s}^{-1}$ ) and wind vectors ( $u$  and  $-\omega$ ) averaged over  $20^{\circ}\text{--}30^{\circ}$  N and (c)  $30^{\circ}\text{--}40^{\circ}$  N. White dotted regions indicate areas at the 99% confidence level based on the two-tailed Student's  $t$  test.

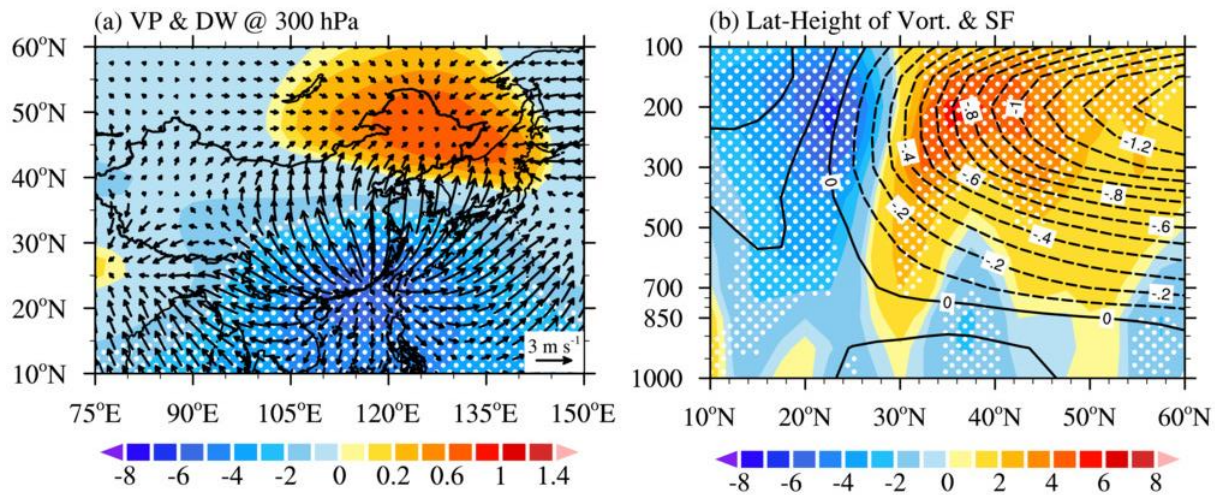

810 Figure 7: Composite (a) divergent wind (arrows) and velocity potential (shading, unit:  $10^6 \text{ m}^2 \text{ s}^{-1}$ ) at 200 hPa, (b) latitude–height cross section of the stream function (contours, unit:  $10^8 \text{ m}^2 \text{ s}^{-1}$ ) and relative vorticity (shading, unit:  $1.5 \times 10^{-5} \text{ m}^2 \text{ s}^{-1}$ ) averaged over  $112^\circ\text{--}120^\circ \text{ E}$ , for the 13 SR–NH events. **The divergent wind flows from the minimum to the maximum of the velocity potential field.** White dotted regions indicate areas at the 95% confidence level based on the two-tailed Student’s  $t$  test.

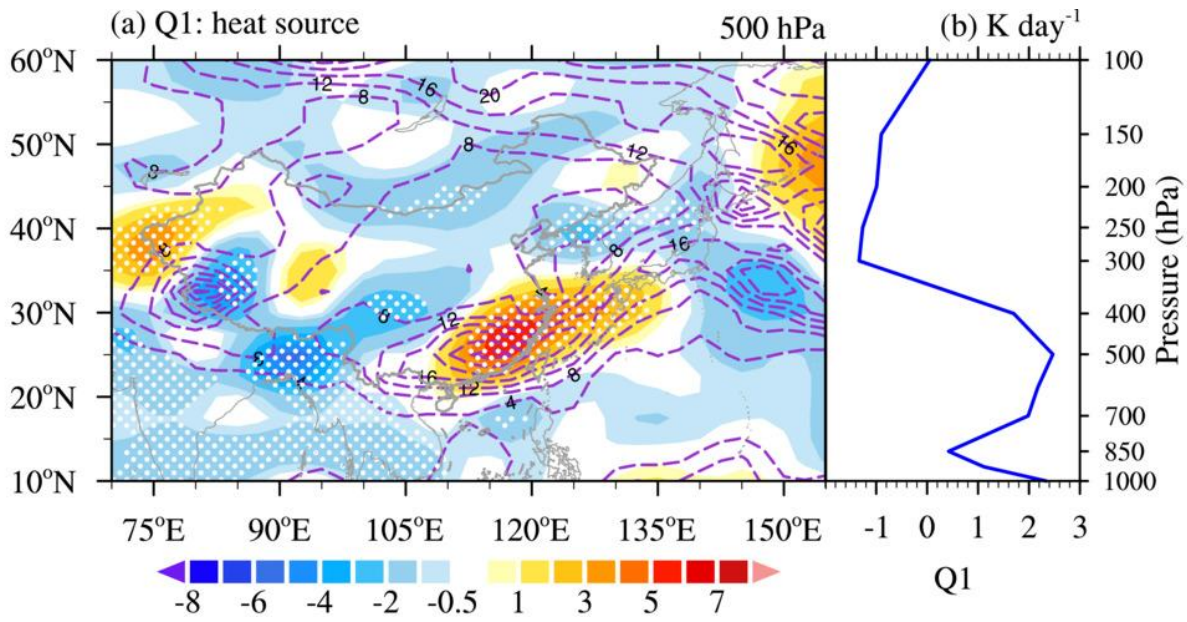

815

**Figure 8: Composite (a)  $Q_1$  (shading, unit:  $\text{K day}^{-1}$ ) and variance (dashed contours, unit: %) at 500 hPa for the 13 SR–NH events, and (b) for the composite vertical profile of the average  $Q_1$  value over the domain  $20^\circ\text{--}30^\circ\text{ N}$ ,  $110^\circ\text{--}120^\circ\text{ E}$ . White dotted regions indicate areas at the 95% confidence level based on the two-tailed Student's  $t$  test.**

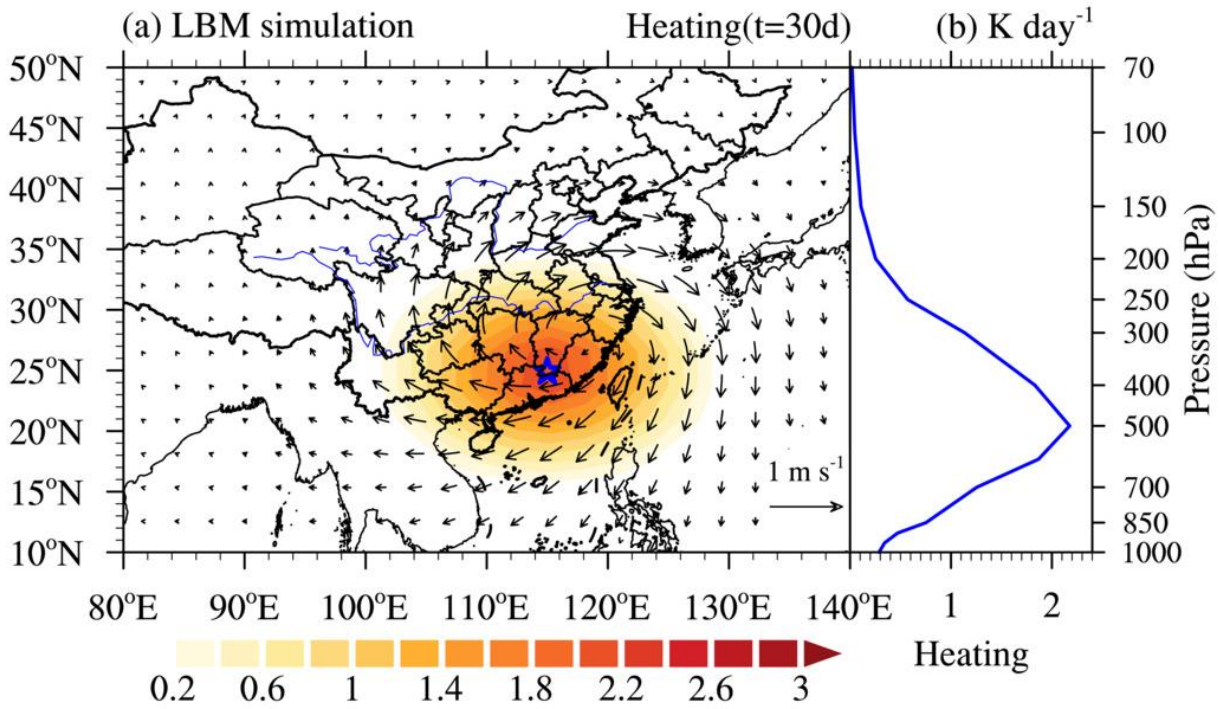

820

**Figure 9:** (a) Heat forcing at 500 hPa (shading, unit: K day<sup>-1</sup>) and the steady response of wind at 300 hPa (vectors, unit: m s<sup>-1</sup>) and (b) profile of the heat forcing at location marked in by the blue star in Fig. 9a.



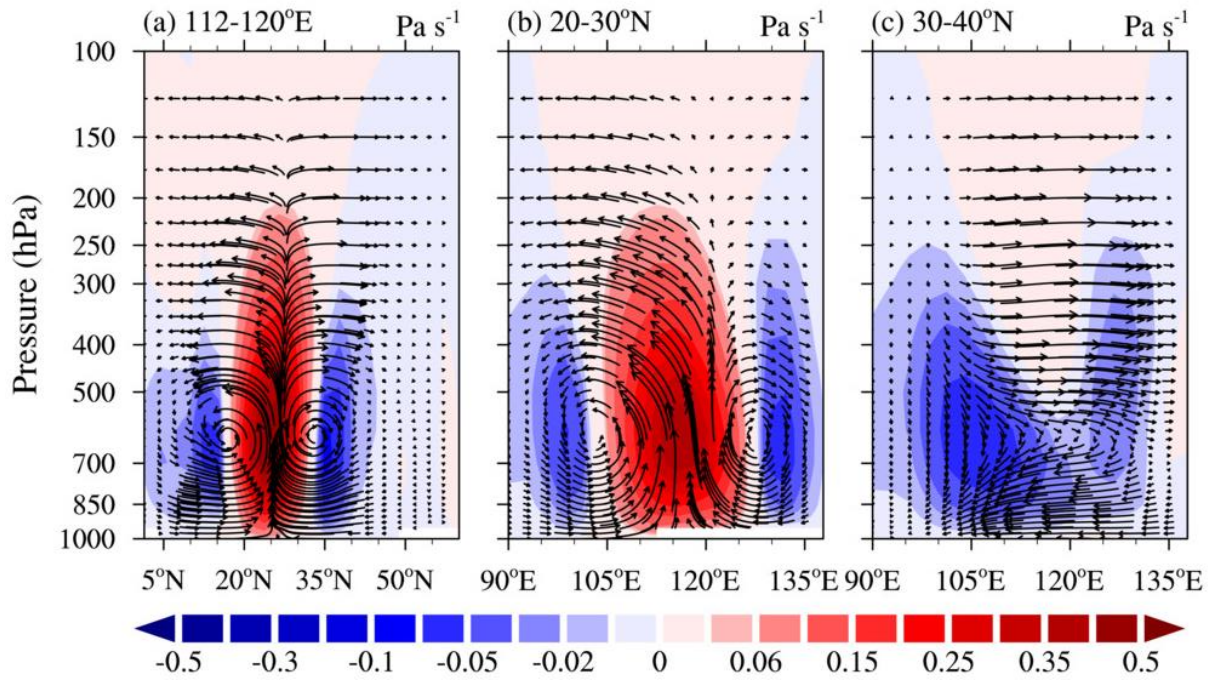

825 Figure 10: As Fig. 6, except for the results from the LBM. For clarity,  $\omega$  is multiplied by  $-20$ .

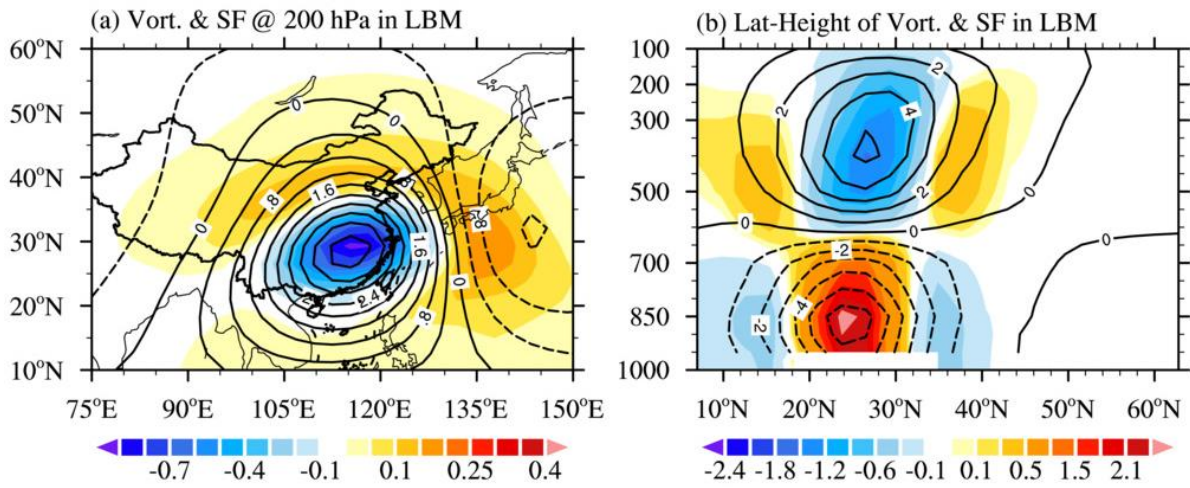

830 **Figure 11: (a) Horizontal distribution of stream function (contours, unit:  $10^6 \text{ m}^2 \text{ s}^{-1}$ ) and relative vorticity (shading, unit:  $10^{-6} \text{ m}^2 \text{ s}^{-1}$ ) at 200 hPa in the LBM. (b) Latitude–height cross section of the stream function (contour, unit:  $10^6 \text{ m}^2 \text{ s}^{-1}$ ) and relative vorticity (shading, unit:  $10^{-6} \text{ m}^2 \text{ s}^{-1}$ ) averaged over  $112^\circ\text{--}120^\circ \text{ E}$  in the LBM.**

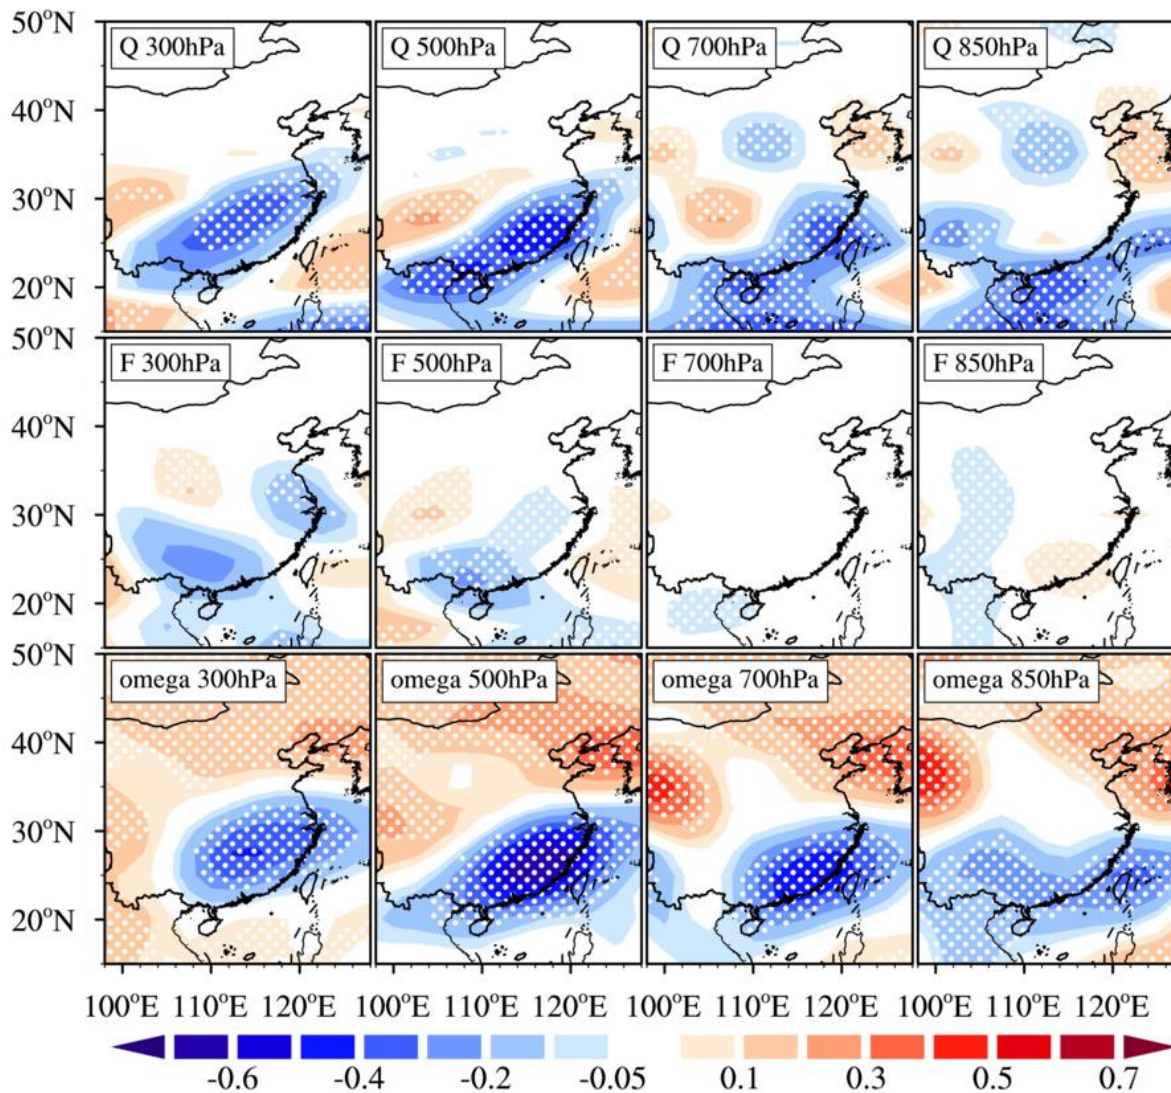

Figure 12: Composite QG decomposition for the 13 SR-NH events. Each column shows a different level. From top to bottom, the rows show the diabatic heating term ( $\frac{R}{p f^2} \nabla^2 Q$ ), the dry forcing term ( $F = \frac{1}{f} \partial_p A d v_{\zeta} + \frac{R}{p f^2} \nabla^2 A d v_T$ ), where  $Q$  is calculated using the Eq. 1), and  $\omega$  (reanalysis data), respectively. The unit of  $\omega$  is  $\text{Pa s}^{-1}$ . The unit of the  $F$  and  $Q$  terms is  $\text{Pa}^{-1} \text{s}^{-1}$ . For ease of viewing, and to reduce the differences in scale, the  $F$ ,  $Q$  terms, and  $\omega$  were multiplied by  $4 \times 10^7$ ,  $0.8 \times 10^7$ , and 4, respectively. White dotted regions indicate areas at the 95% confidence level based on the two-tailed Student's  $t$  test.

835



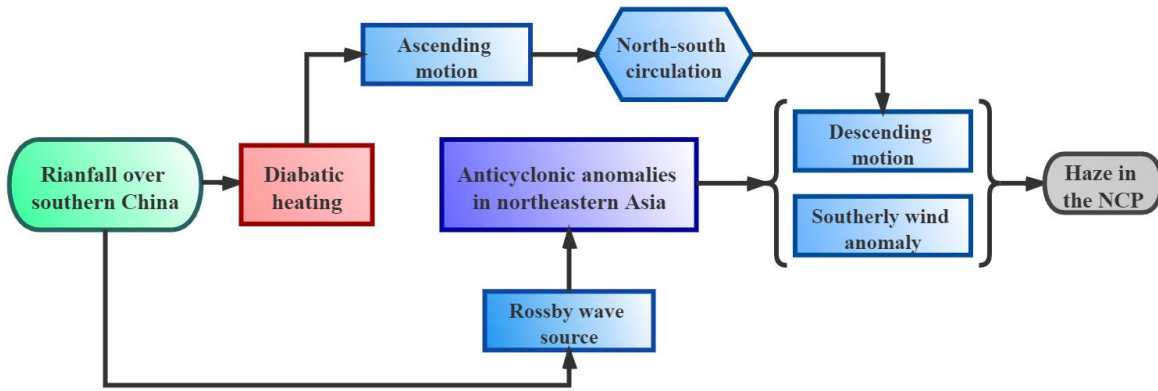

840 **Figure 13: Schematic representation of the impact of heavy rainfall over southern China on haze production over the NCP.**

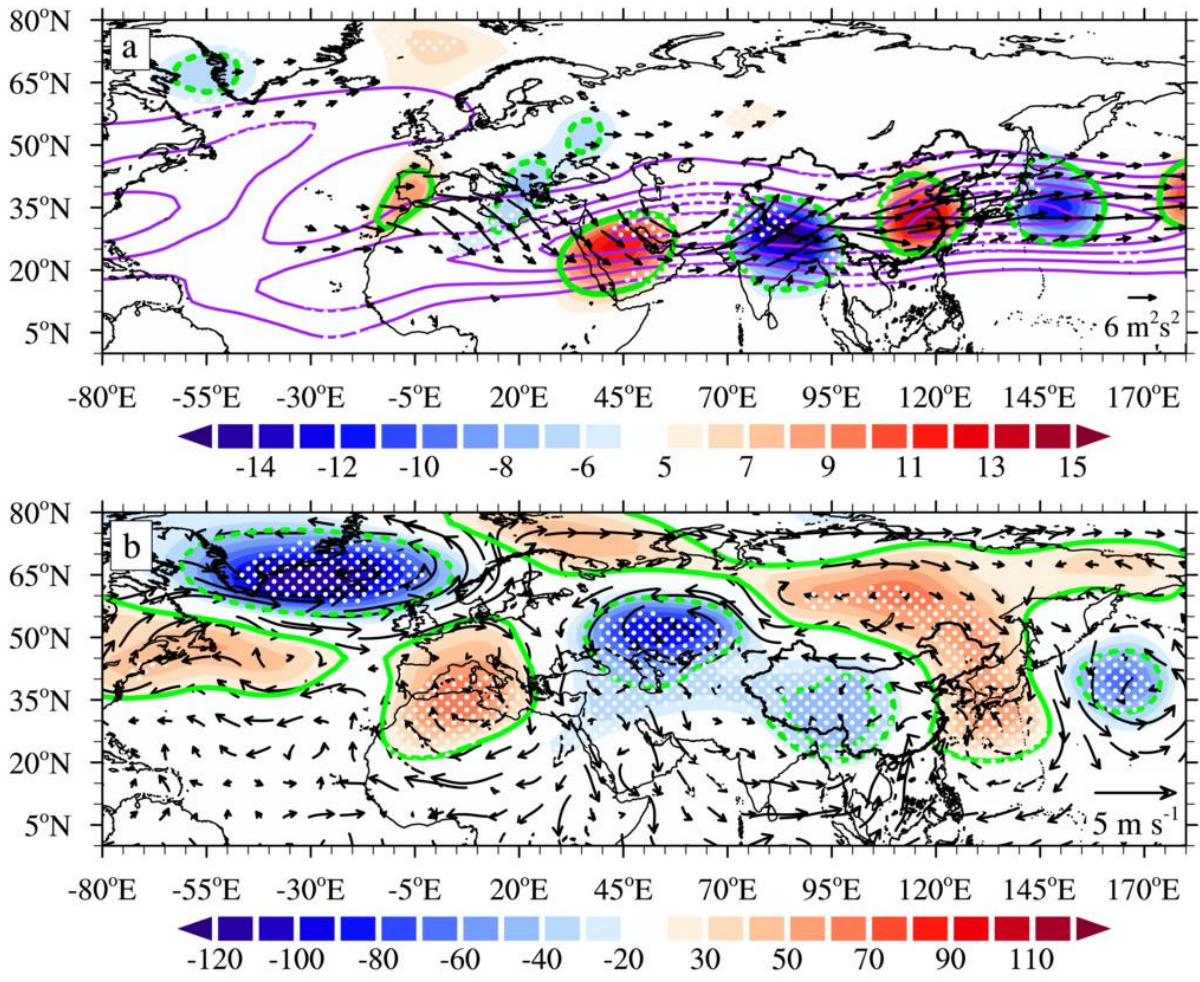

Figure 14: As Fig. 4, but for the 6 SR-noNH events in Table 2.

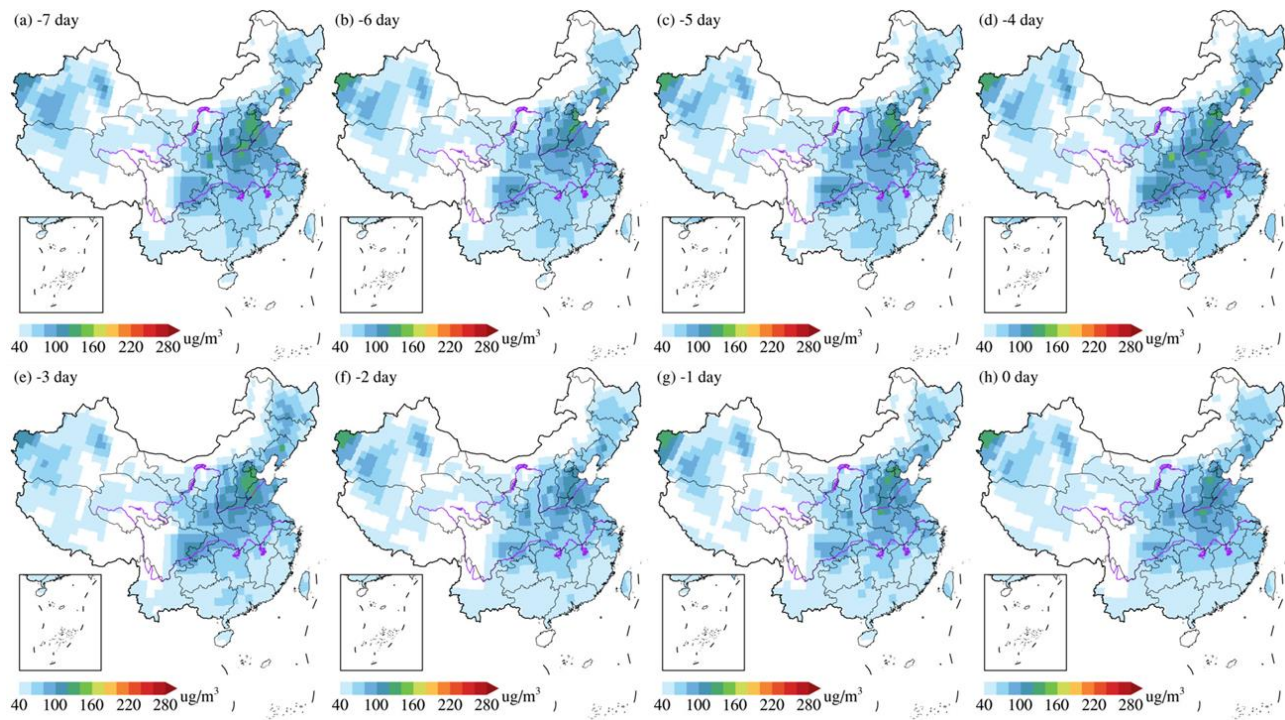

**Figure 15: Composite PM<sub>2.5</sub> concentration for the 6 SR-noNH events in Table 2 at (a) -7, (b) -6, (c) -5, (d) -4, (e) -3, (f) -2, (g) -1, and (h) 0 days.**

850 **Table 1. Start and end dates, and duration, of each SR–NH event.**

| No. | Start and end dates | Duration (days) | No. | Start and end dates | Duration (days) |
|-----|---------------------|-----------------|-----|---------------------|-----------------|
| 1   | 4–8 Feb 1985        | 5               | 8   | 13–15 Dec 2006      | 3               |
| 2   | 29–31 Dec 1988      | 3               | 9   | 22–24 Dec 2007      | 3               |
| 3   | 4–8 Jan 1989        | 5               | 10  | 25 Feb – 6 Mar 2009 | 10              |
| 4   | 1–5 Jan 1992        | 5               | 11  | 12–17 Jan 2012      | 6               |
| 5   | 7–12 Dec 1994       | 6               | 12  | 13–17 Dec 2013      | 5               |
| 6   | 7–11 Jan 1998       | 5               | 13  | 8–13 Jan 2015       | 6               |
| 7   | 17–20 Dec 2002      | 4               |     |                     |                 |

**Table 2. Start and end dates, and duration, of each SR–noNH event.**

| No. | Start and end dates | Duration (days) | No. | Start and end dates | Duration (days) |
|-----|---------------------|-----------------|-----|---------------------|-----------------|
| 1   | 15–19 Feb 1985      | 5               | 4   | 24–28 Feb 2001      | 3               |
| 2   | 16–18 Feb 1998      | 6               | 5   | 25 Jan – 2 Feb 2008 | 10              |
| 3   | 24–26 Jan 2001      | 3               | 6   | 21–23 Jan 2010      | 6               |
